# Supplementary material for: Design and Synthesis of Carbothioamide/Carboxamide-Based Pyrazoline Analogs as Potential Anticancer Agents: Apoptosis, Molecular Docking, ADME Assay, and DNA Binding Studies
Source: PubMed Central journal article supplement (PMC9260921; doi:10.1021/acsomega.2c02033), 2022-06-23
Supplement: ao2c02033_si_001.pdf [file ao2c02033_si_001.pdf]

# Design and Synthesis of Carbothioamide/Carboxamide-Based Pyrazoline Analogs as Potential Anticancer Agents: Apoptosis, Molecular Docking, ADME Assay, and DNA Binding Studies

Manish Rana<sup>a</sup>, Md Imam Faizan<sup>b</sup>, Sajad Hussain Dar<sup>a</sup>, Tanveer Ahmad<sup>b</sup> and Rahisuddin<sup>a,\*</sup>

<sup>a</sup>Department of Chemistry, Jamia Millia Islamia, New Delhi 110025, INDIA,

<sup>b</sup>Multidisciplinary Centre for Advanced Research & Studies, Jamia Millia Islamia, New Delhi 110025, INDIA

\*Author for correspondence:

[rahisuddin@jmi.ac.in](mailto:rahisuddin@jmi.ac.in) (+919871460479)

## Contents

|                                  |    |
|----------------------------------|----|
| 1. NMR spectra of products.....  | S1 |
| 2. IR spectra of products.....   | S2 |
| 3. Mass spectra of products..... | S3 |
| 4. HPLC spectra of products..... | S4 |
| 5. HRMS of lead compounds.....   | S5 |

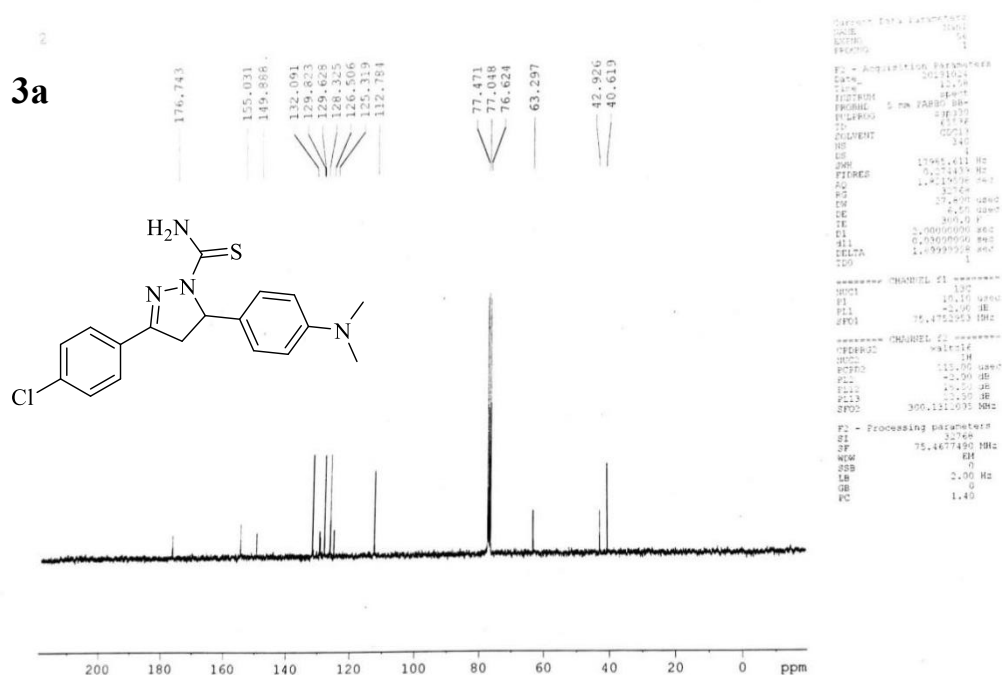

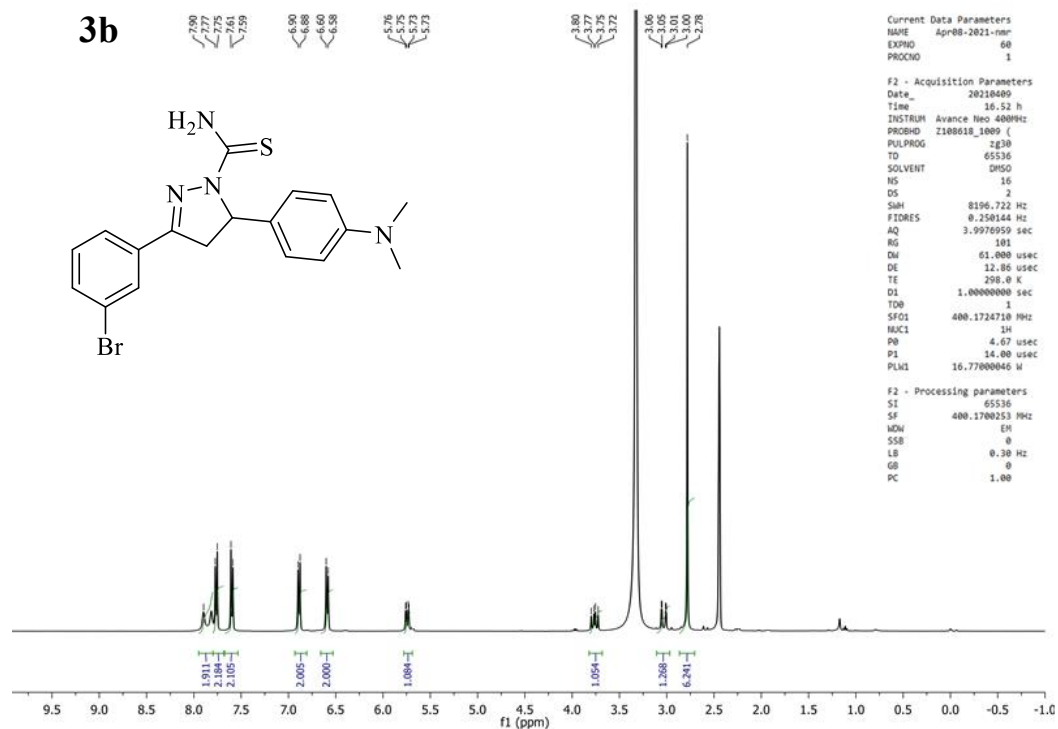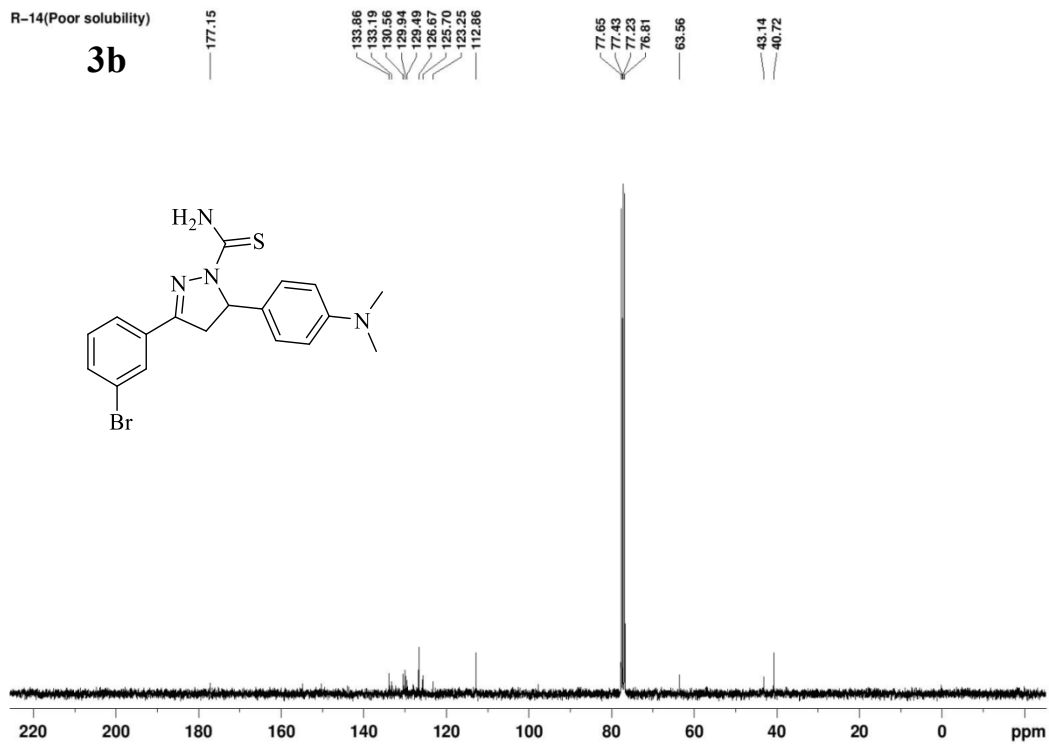

3c

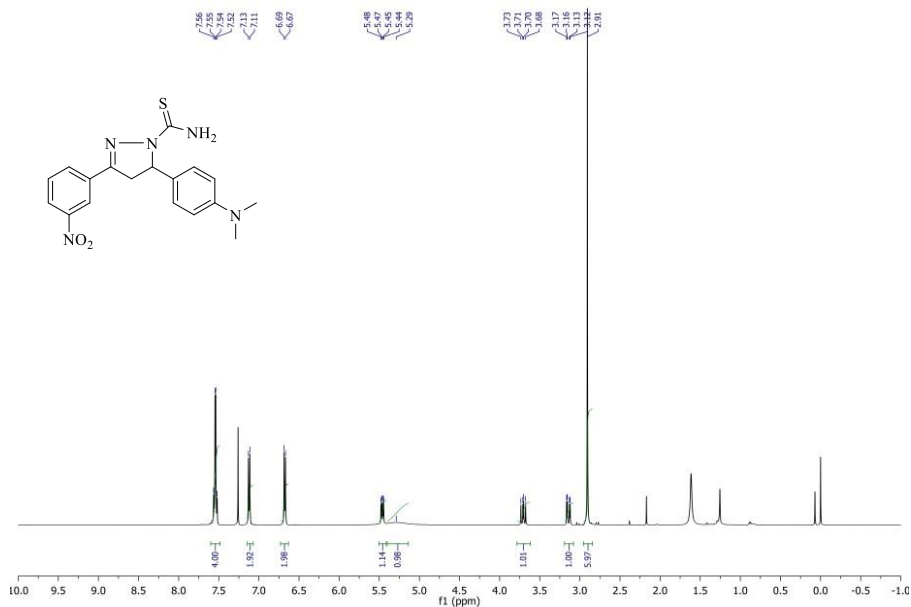

3c

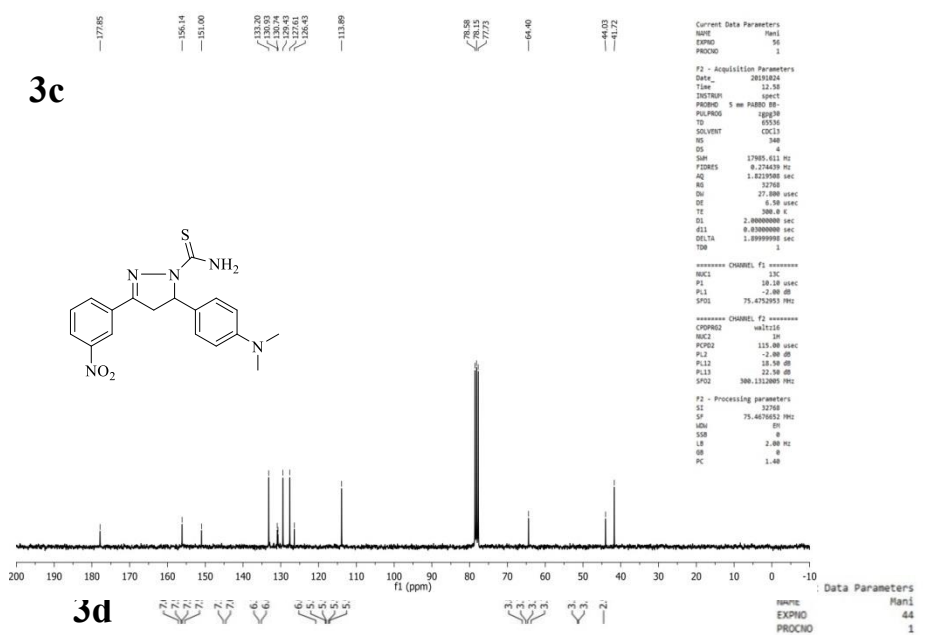

3d

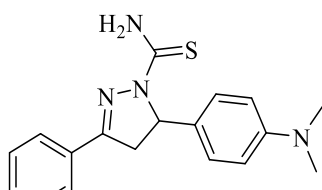

F2 - Acquisition Parameters  
Date\_ 20191022  
Time 13.19  
INSTRUM spect  
PROBHD 5 mm PABBO 8B-  
PULPROG zg30  
TD 65536  
SOLVENT CDCl3  
NS 16  
DS 2  
SWH 6172.830 Hz  
FIDRES 0.094190 Hz  
AQ 5.3884660 sec  
RG 362  
SFO 75.4676652 MHz  
WDW EM  
SSB 0  
LB 2.00 Hz  
GB 4  
PC 1.40

3d

178.58  
176.65  
169.83  
154.88  
149.74  
137.09  
129.82  
129.60  
128.32  
126.50  
125.32  
116.52  
112.77

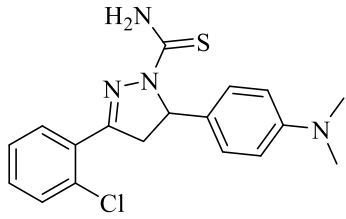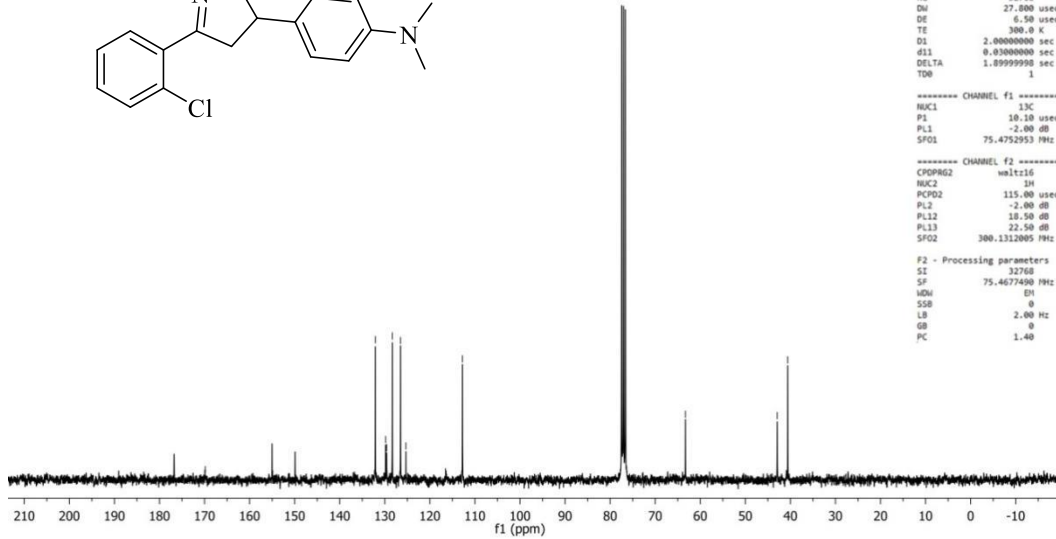

Current Data Parameters  
NAME Mani  
EXPNO 47  
PROCNO 1

F2 - Acquisition Parameters  
Date\_ 20191022  
Time 13.55  
INSTRUM spect  
PROBHD 5 mm PABBO BBI-  
PULPROG zgpg30  
TD 65536  
SOLVENT CDCl3  
NS 506  
DS 4  
SFO 17985.611 Hz  
FIDRES 0.274439 Hz  
AQ 1.8219500 sec  
RG 32768  
DE 27.800 usec  
TE 300.0 K  
D1 2.00000000 sec  
d11 0.03000000 sec  
DELTA 1.89999998 sec  
TD0 1

\*\*\*\*\* CHANNEL f1 \*\*\*\*\*  
NUC1 13C  
P1 10.10 usec  
PL1 -2.00 dB  
SFO1 75.4752953 MHz

\*\*\*\*\* CHANNEL f2 \*\*\*\*\*  
CPDPRG2 waltz16  
NUC2 1H  
PCPD2 115.00 usec  
PL2 -2.00 dB  
PL12 18.50 dB  
PL13 22.50 dB  
SFO2 300.1312005 MHz

F2 - Processing parameters  
SI 32768  
SF 75.4677400 MHz  
WDW EM  
SSB 0  
LB 2.00 Hz  
GB 0  
PC 1.40

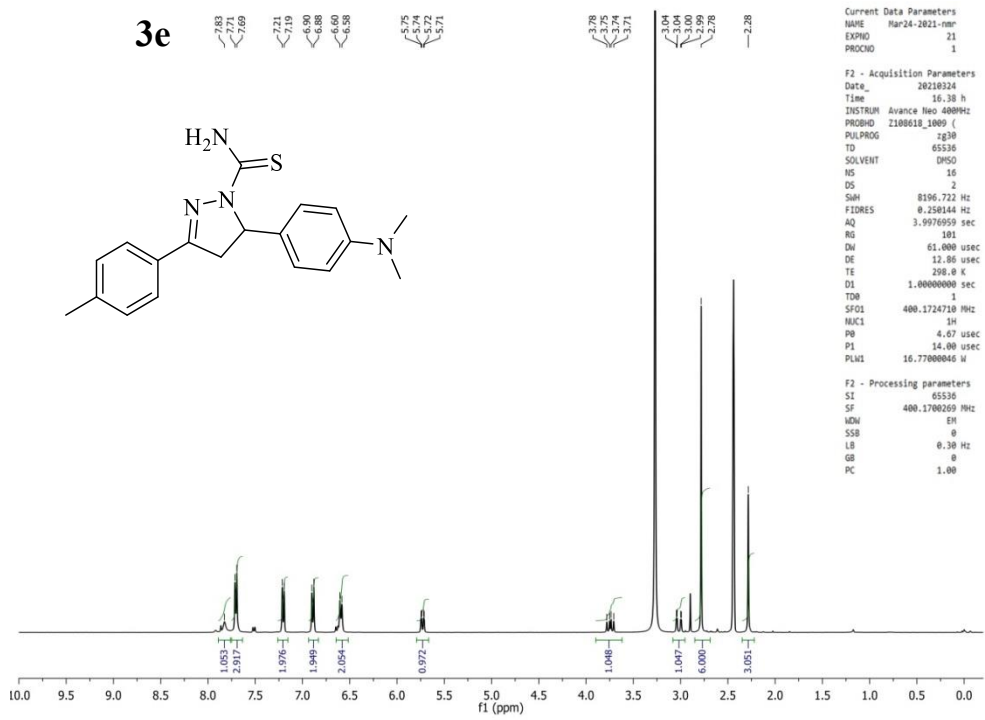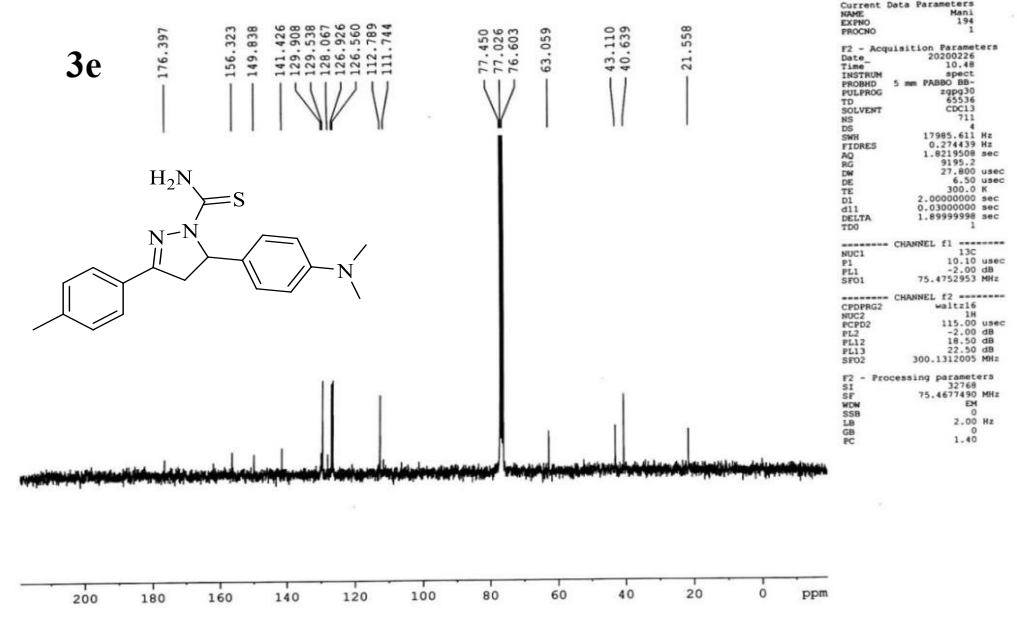

3f

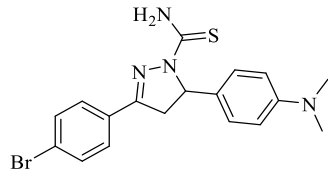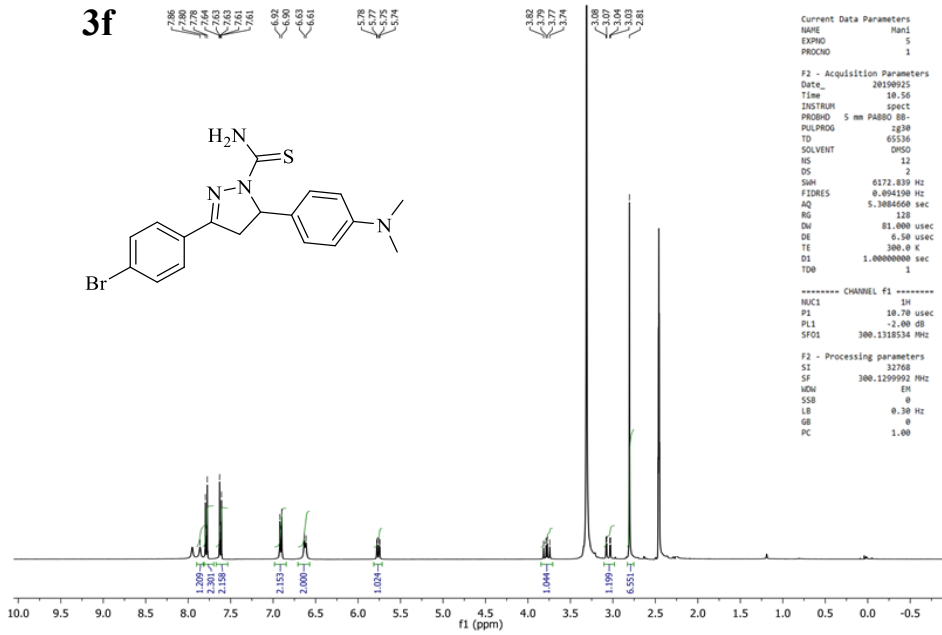

3f

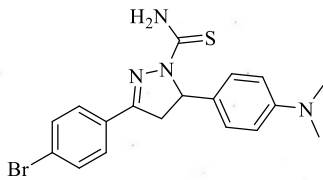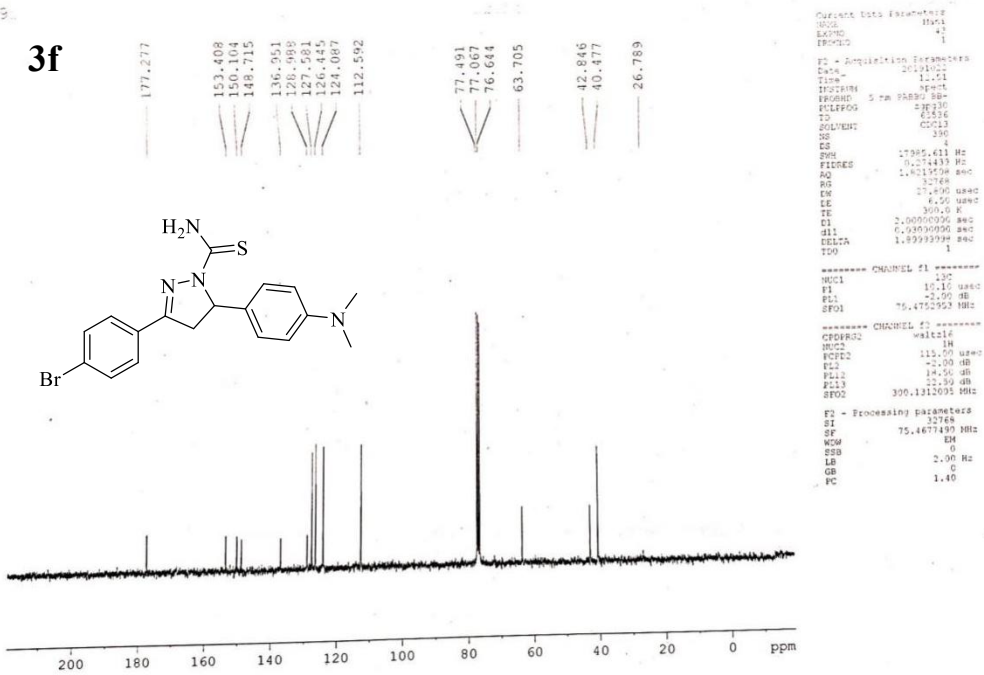

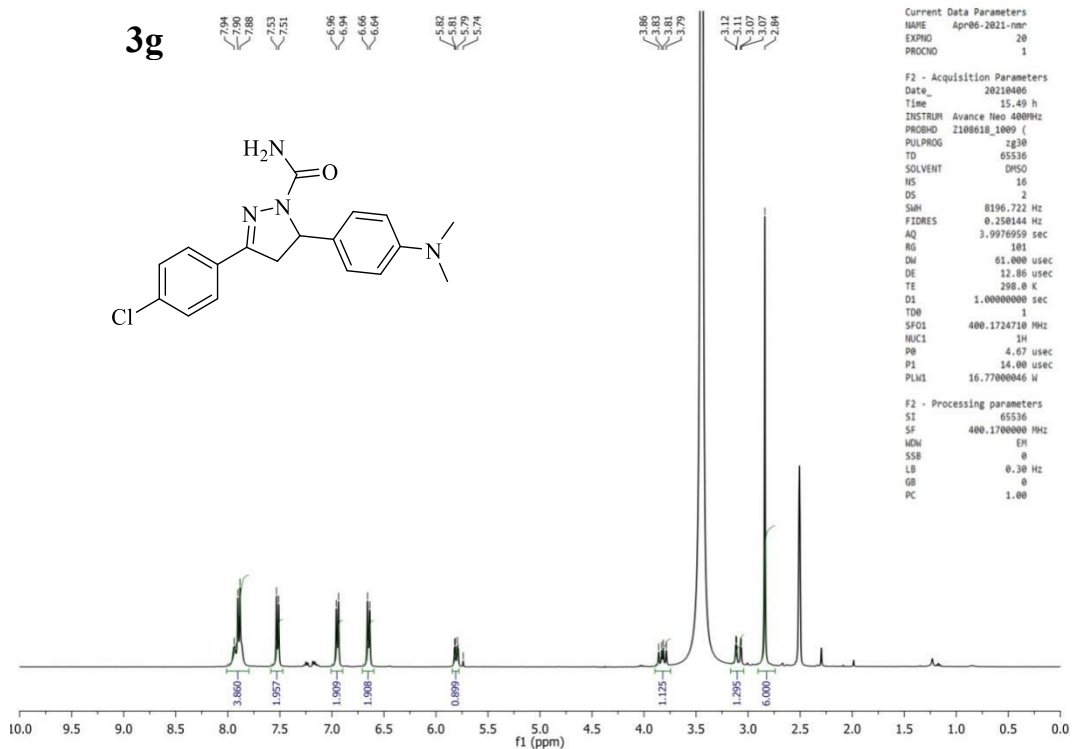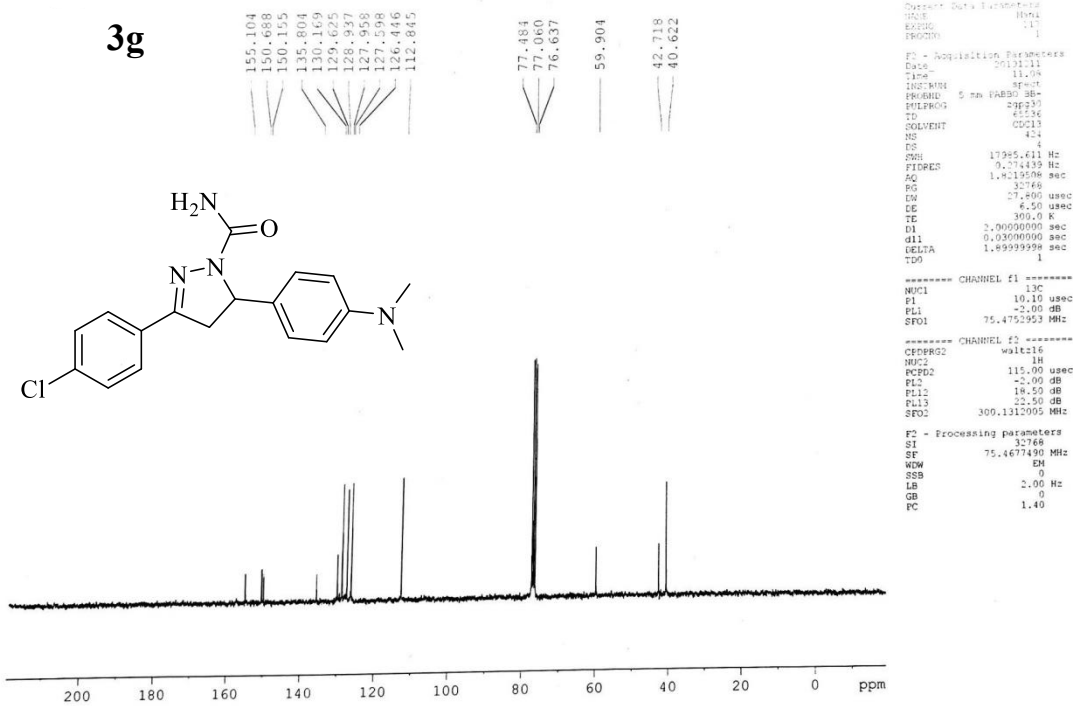

3h

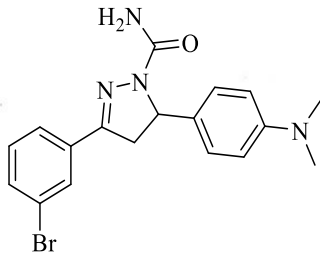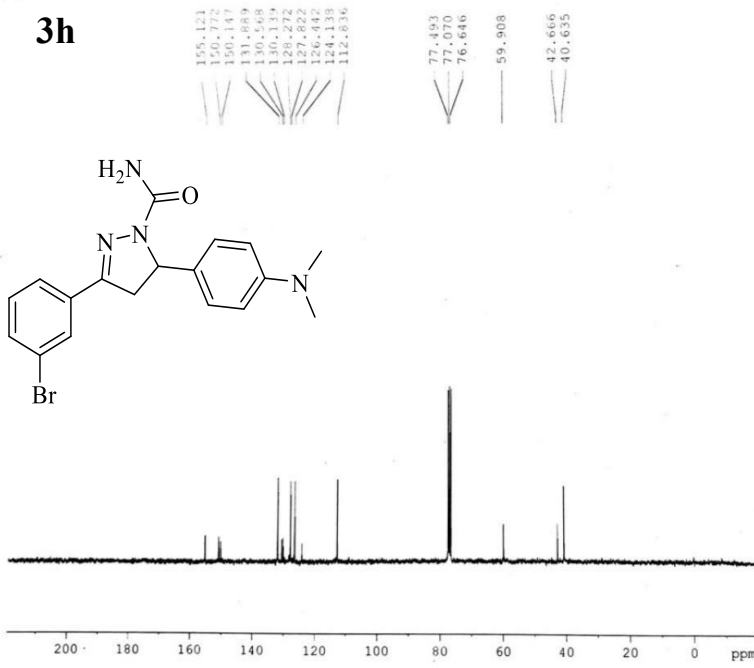

```
===== Acquisition Parameters =====
NAME      3h
EXPNO     1
PROCNO    1
F2 - Acquisition Parameters
Date_     201111
Time      11.49
INSTRUM   spect
PROBHD    5 mm WBBO BB-
PULPROG   zgpg30
TD         65536
SOLVENT   CDCl3
NS         274
DS         4
SWH        1795.411 Hz
FIDRES     0.174839 Hz
AQ         1.821978 sec
RG         32768
RW         27.400 usec
DE         6.50 usec
TE         300.2 K
D1         2.00000000 sec
d11        0.03000000 sec
DELTA     1.89999998 sec
TD0        1
===== CHANNEL f1 =====
NUC1       13C
P1         10.10 usec
PL1        -2.00 dB
SFO1       75.4752853 MHz
===== CHANNEL f2 =====
CFDPFG2   waltz16
NUC2       1H
PCPD2     115.00 usec
PL2        -2.00 dB
PL12       18.50 dB
PL13       22.50 dB
SFO2       300.1312005 MHz
F2 - Processing parameters
SI         32768
SF         75.4677490 MHz
WDW        EM
SSB         0
LB         2.00 Hz
GB         0
PC         1.40
```



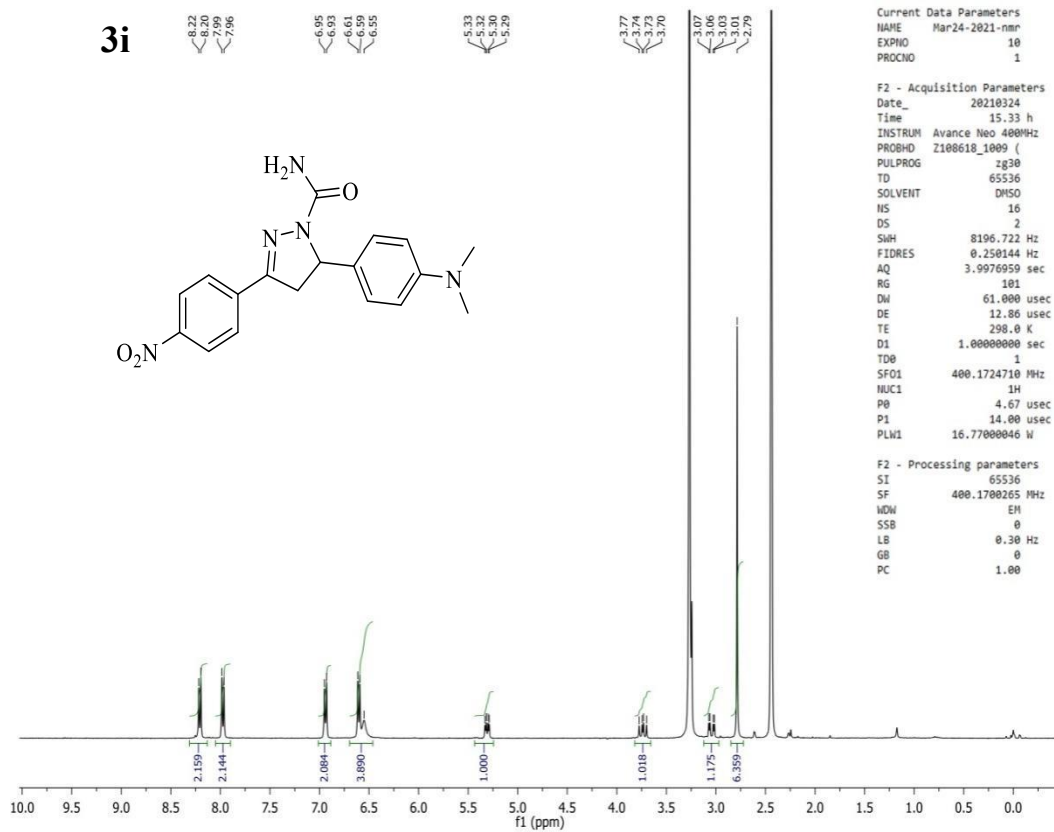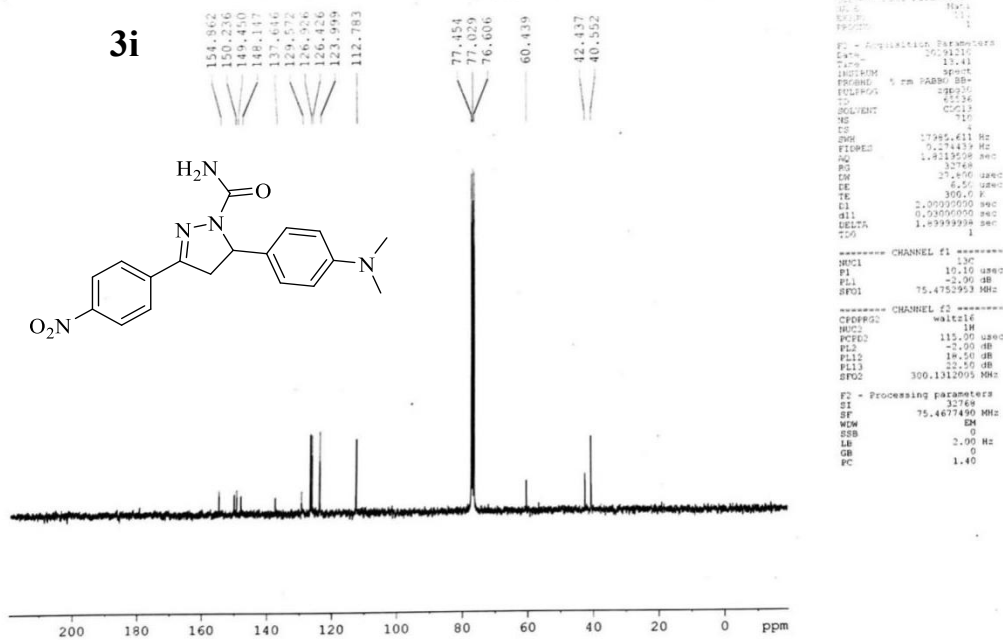

3j

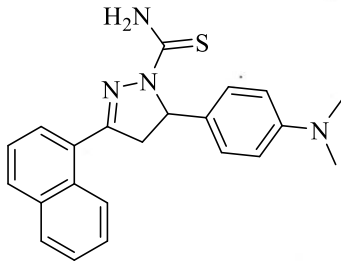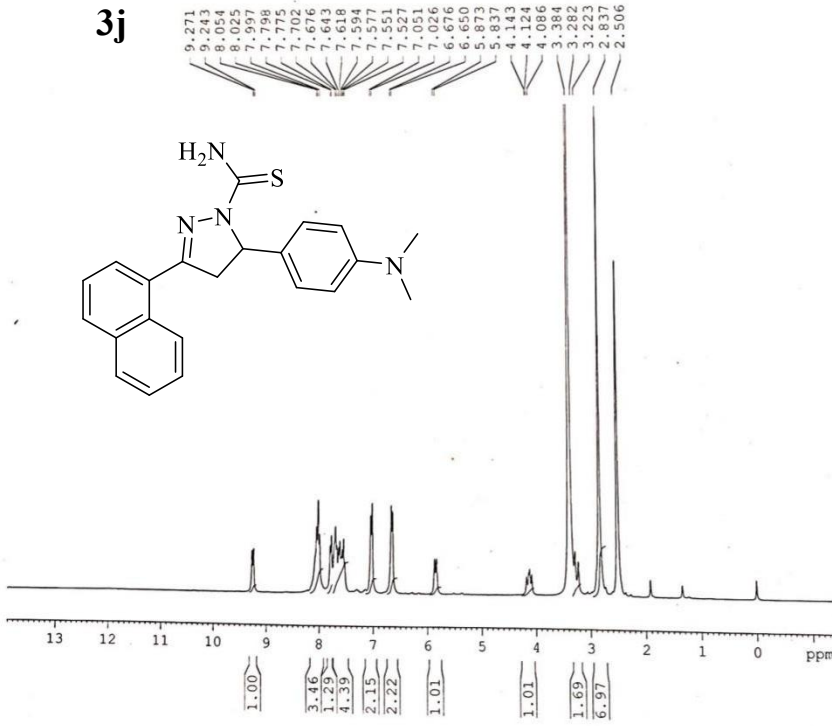

```

Current Data Parameters
NAME      Man1
EXPNO    2
PROCNO   1

F2 - Acquisition Parameters
Date_    20190215
Time     10.56
INSTRUM  spect
PROBHD   5 mm PABBO Bb-
PULPROG  zg30
TD        65536
SOLVENT  DMSO
NS        12
DS        2
SWH       6172.835 Hz
FIDRES    0.094190 Hz
AQ        5.308460 sec
RG        128
DW        61.000 usec
DE        6.50 usec
TE        300.0 K
D1        1.00000000 sec
TD0       1

----- CHANNEL f1 -----
NUC1      1H
P1        10.70 usec
PL1       -2.00 dB
SFO1      300.1318534 MHz

F2 - Processing parameters
SI        32768
SF        300.1299992 MHz
WDW       EM
SSB       0
LB        0.30 Hz
GB        0
PC        1.00
  
```

3j

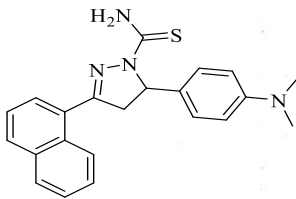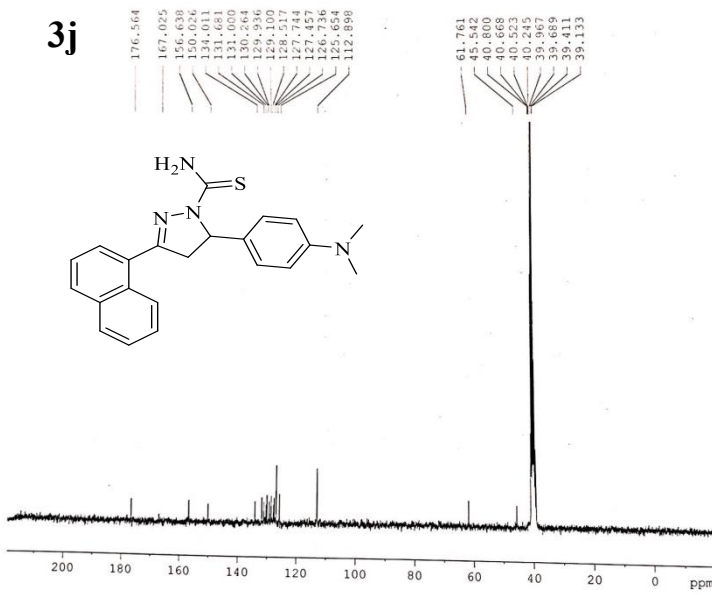

```

Current Data Parameters
NAME      20 sept 2019
EXPNO    1
PROCNO   1

F2 - Acquisition Parameters
Date_    20190215
Time     13.14
INSTRUM  spect
PROBHD   5 mm PABBO Bb-
PULPROG  zgpg30
TD        65536
SOLVENT  DMSO
NS        419
DS        4
SWH       17985.411 Hz
FIDRES    0.274439 Hz
AQ        1.8119038 sec
RG        12768
DW        27.800 usec
DE        6.50 usec
TE        300.0 K
D1        2.00000000 sec
d11       0.13300000 sec
DELTA     1.89999999 sec
TD0       1

----- CHANNEL f1 -----
NUC1      13C
P1        10.10 usec
PL1       -2.00 dB
SFO1      75.4752993 MHz

----- CHANNEL f2 -----
NUC2      1H
P2        115.00 usec
PL2       -2.00 dB
PL12      19.50 dB
PL13      21.50 dB
SFO2      300.1312093 MHz

F2 - Processing parameters
SI        32768
SF        75.4677490 MHz
WDW       EM
SSB       0
LB        2.00 Hz
GB        0
PC        1.40
  
```

3k

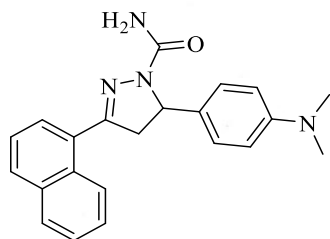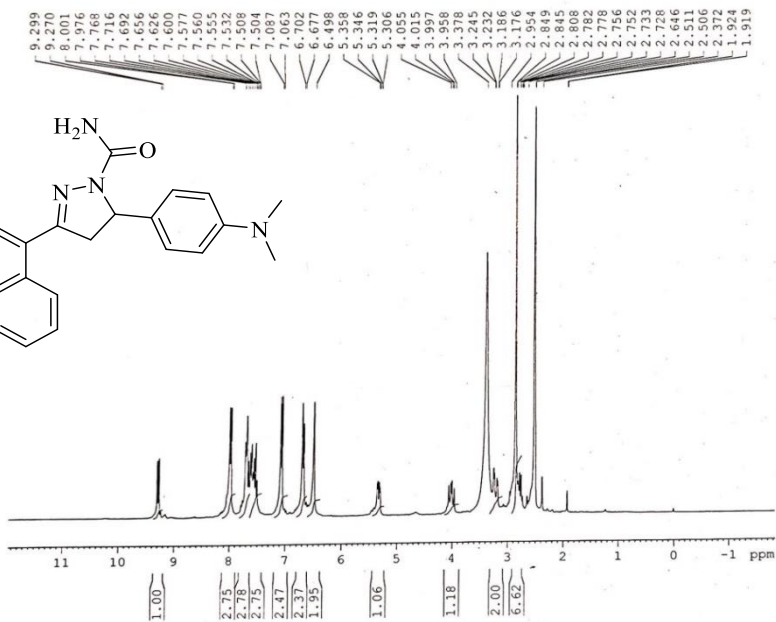

```

Current Data Parameters
NAME      Mar1
EXPNO    11
PROCNO   1

F2 - Acquisition Parameters
Date_    20190216
Time     10.20
INSTRUM  spect
PROBHD   5 mm PABBO BB-
PULPROG  zgpg30
TD        65536
SOLVENT  DMSO
NS        4
DS        4
SFO1     300.1312005 MHz
SF        300.1312005 MHz
AQ        0.094190 sec
RG        128
DE        6.50 usec
TE        300.0 K
D1        1.90000000 sec
DELTA    1
TD0       1

----- CHANNEL f1 -----
NUC1      13C
P1        10.70 usec
PL1       -2.00 dB
SFO1     300.1316534 MHz

F2 - Processing parameters
SI        32768
SF        300.1279950 MHz
WDW       EM
SSB       0
LB        0.30 Hz
GB        0
PC        1.00

```

9

3k

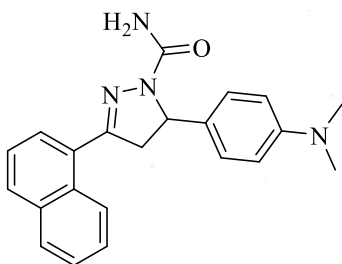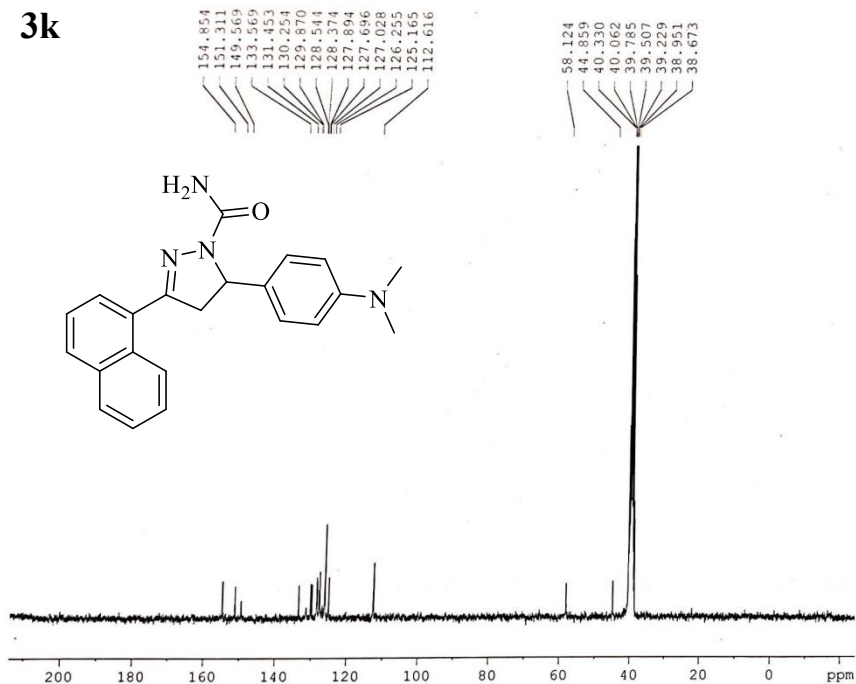

```

Current Data Parameters
NAME      Mar1
EXPNO    11
PROCNO   1

F2 - Acquisition Parameters
Date_    20190216
Time     9.54
INSTRUM  spect
PROBHD   5 mm PABBO BB-
PULPROG  zgpg30
TD        65536
SOLVENT  DMSO
NS        4
DS        4
SFO1     300.1312005 MHz
SF        300.1312005 MHz
AQ        1.8219508 sec
RG        32768
DE        27.500 usec
TE        300.0 K
D1        2.00000000 sec
d11      0.03000000 sec
DELTA    1.89999996 sec
TD0       1

----- CHANNEL f1 -----
NUC1      13C
P1        10.10 usec
PL1       -2.00 dB
SFO1     75.4752953 MHz

----- CHANNEL f2 -----
CPDPRG2  waltz16
NUC2      1H
PCPD2    115.00 usec
PL2      -2.00 dB
PL12     18.50 dB
PL13     22.50 dB
SFO2     300.1312005 MHz

F2 - Processing parameters
SI        32768
SF        75.4681433 MHz
WDW       EM
SSB       0
LB        2.00 Hz
GB        0
PC        1.40

```

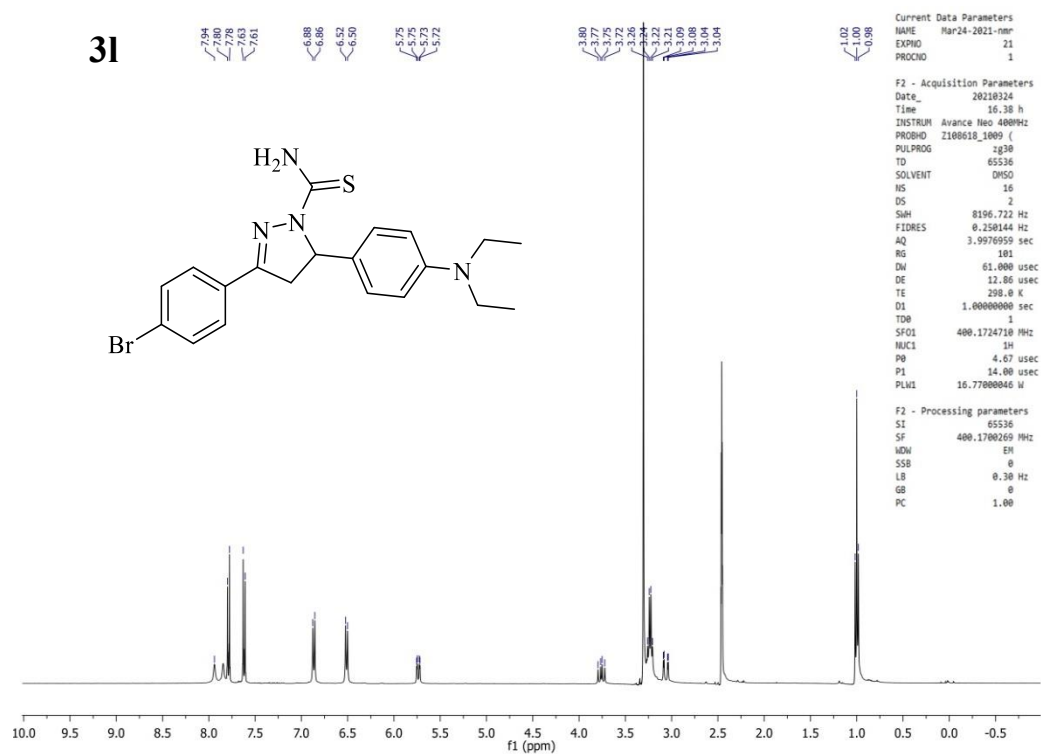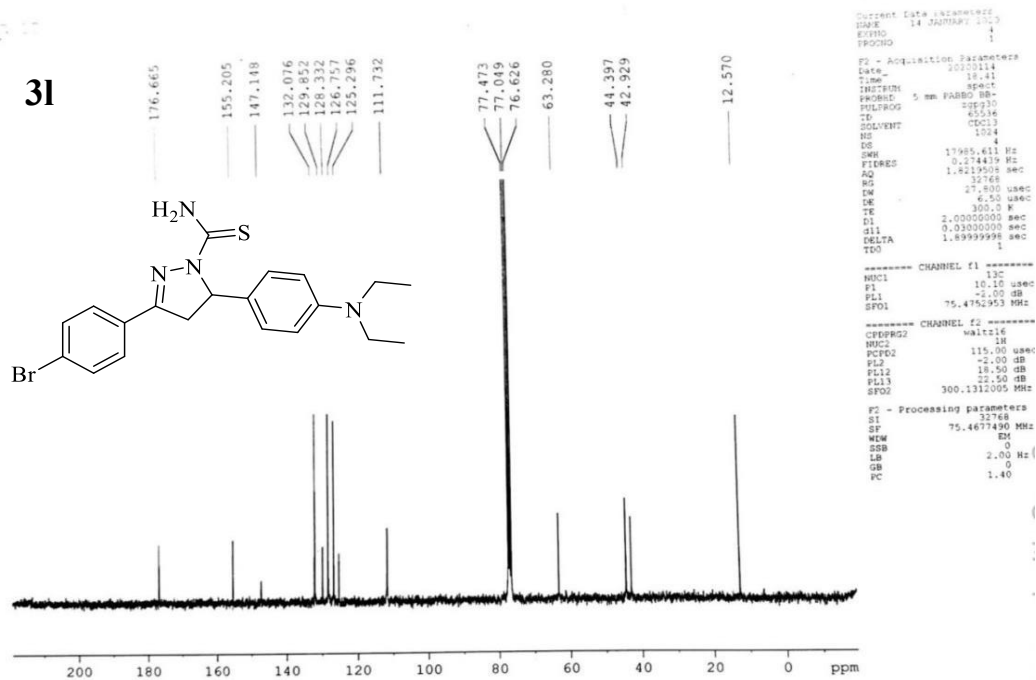

**Figure. S1.**  $^1\text{H}$  NMR spectra of pyrazoline derivatives (3b-3g and 3i-3l) and  $^{13}\text{C}$ -NMR spectra of derivatives 3a-3l.

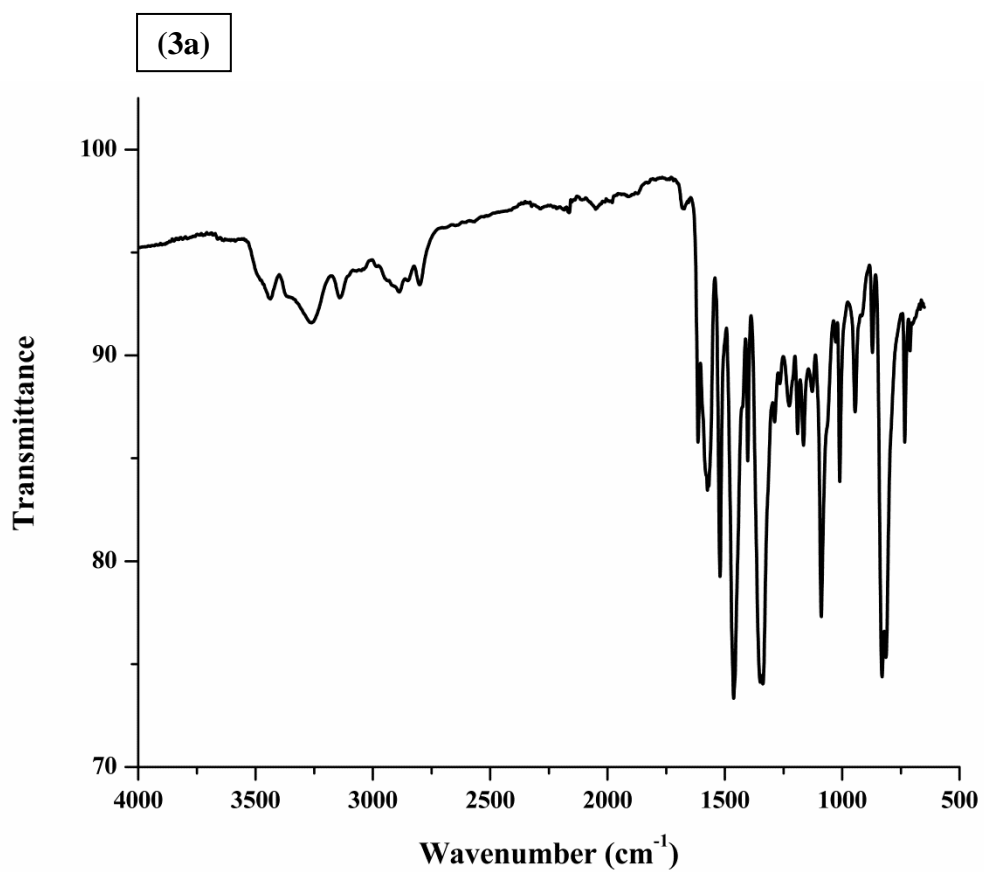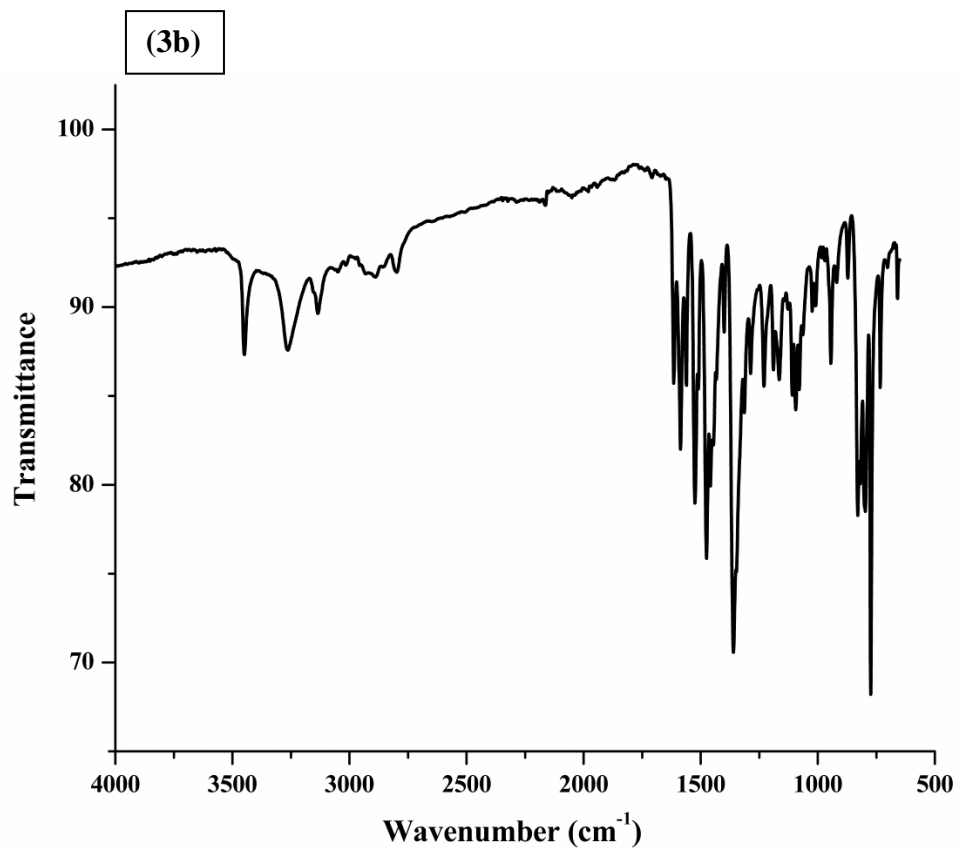

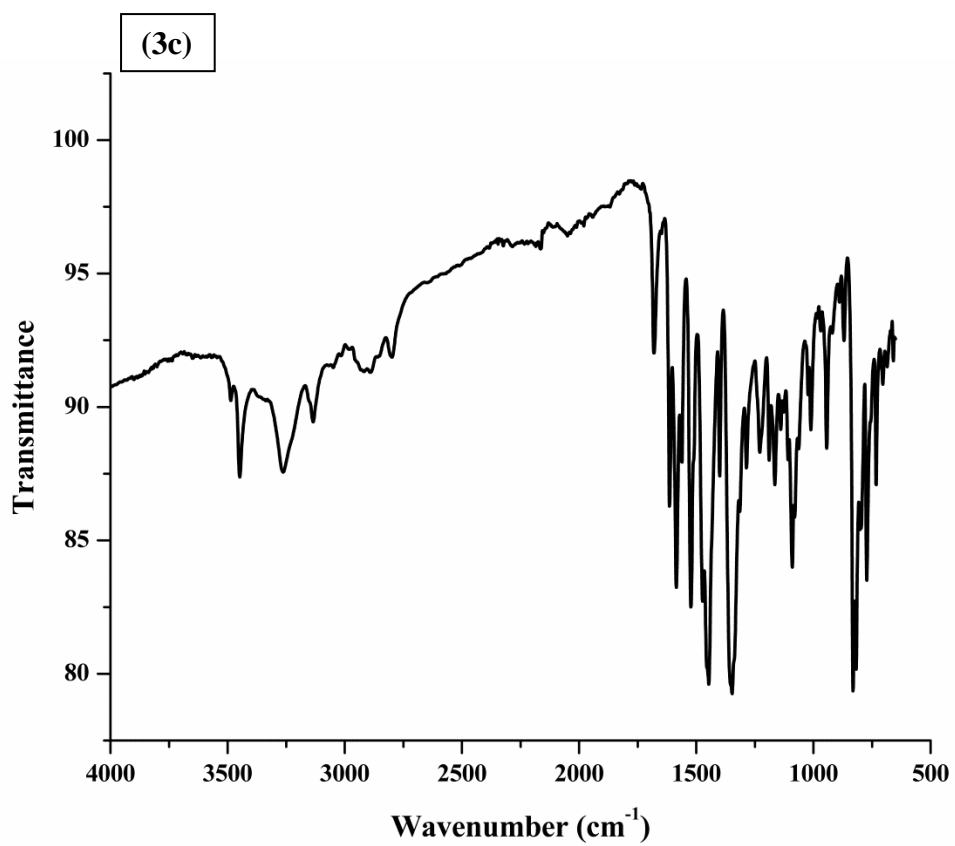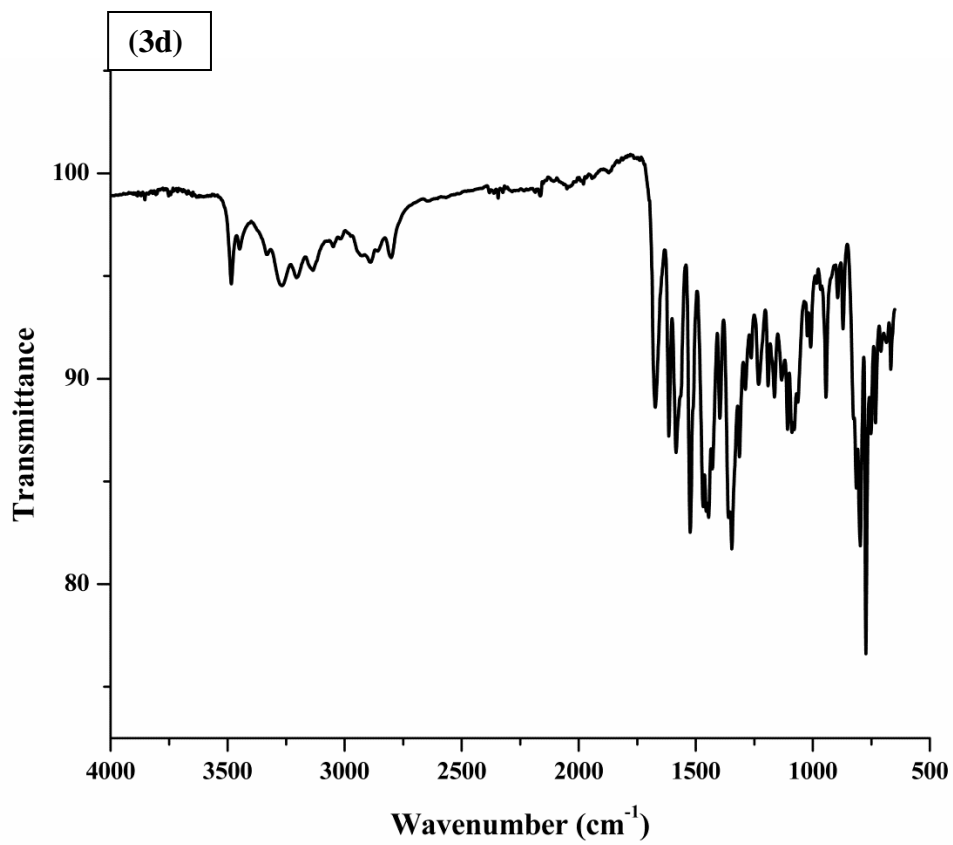

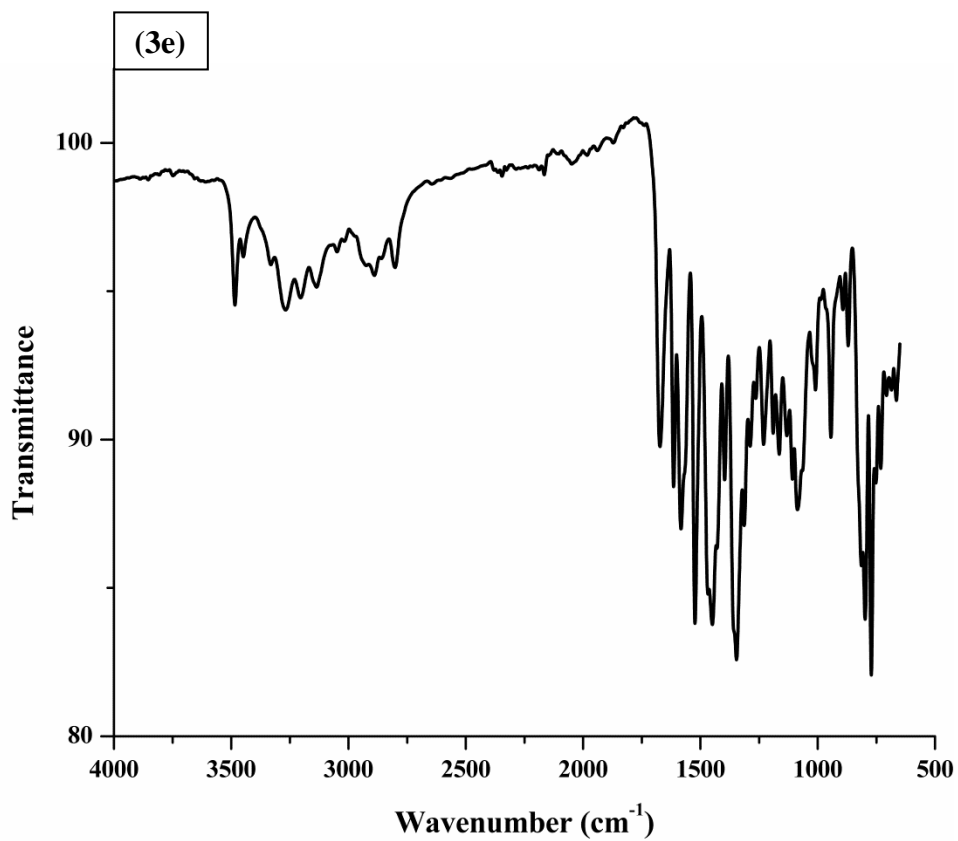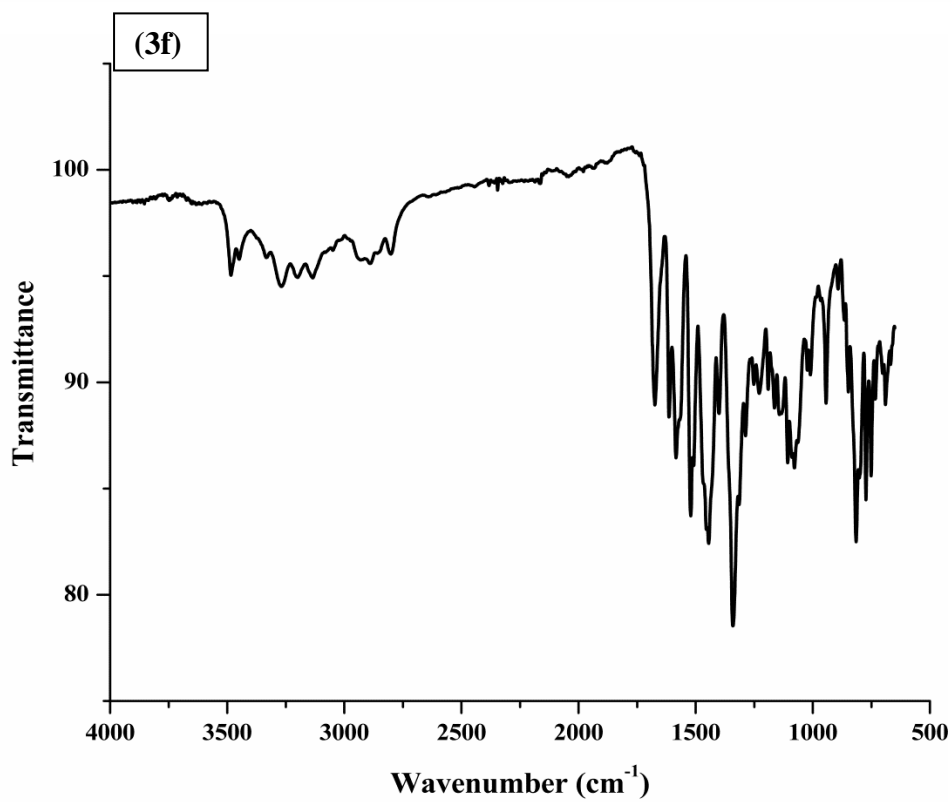

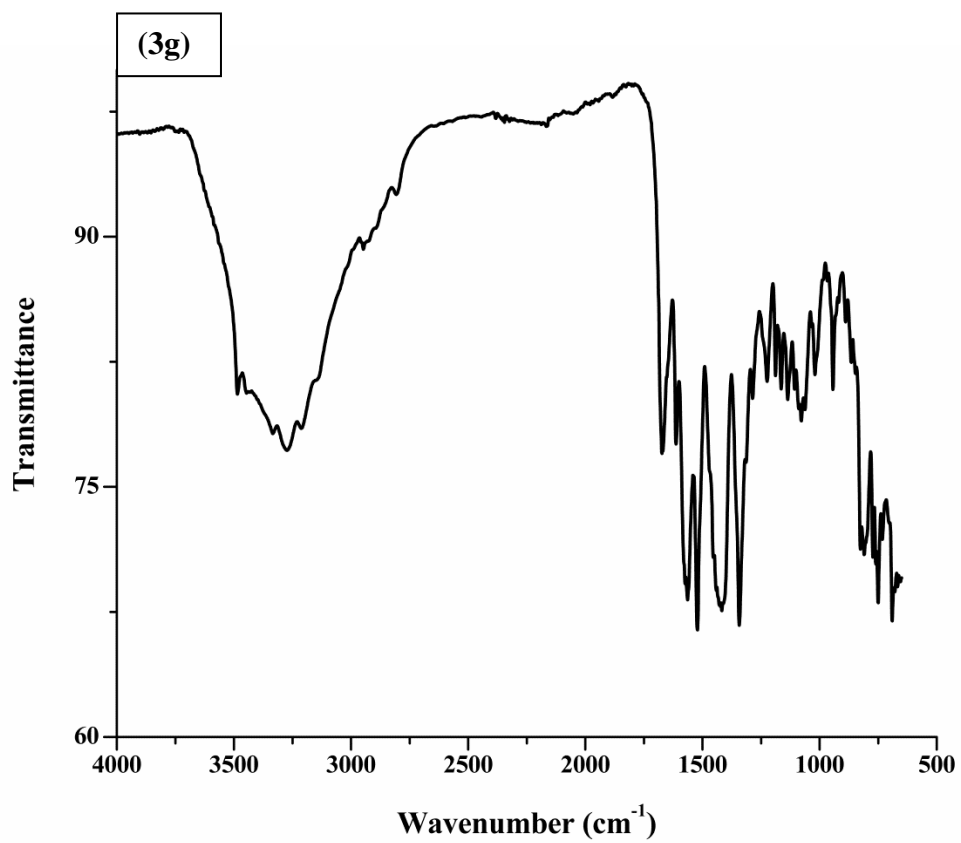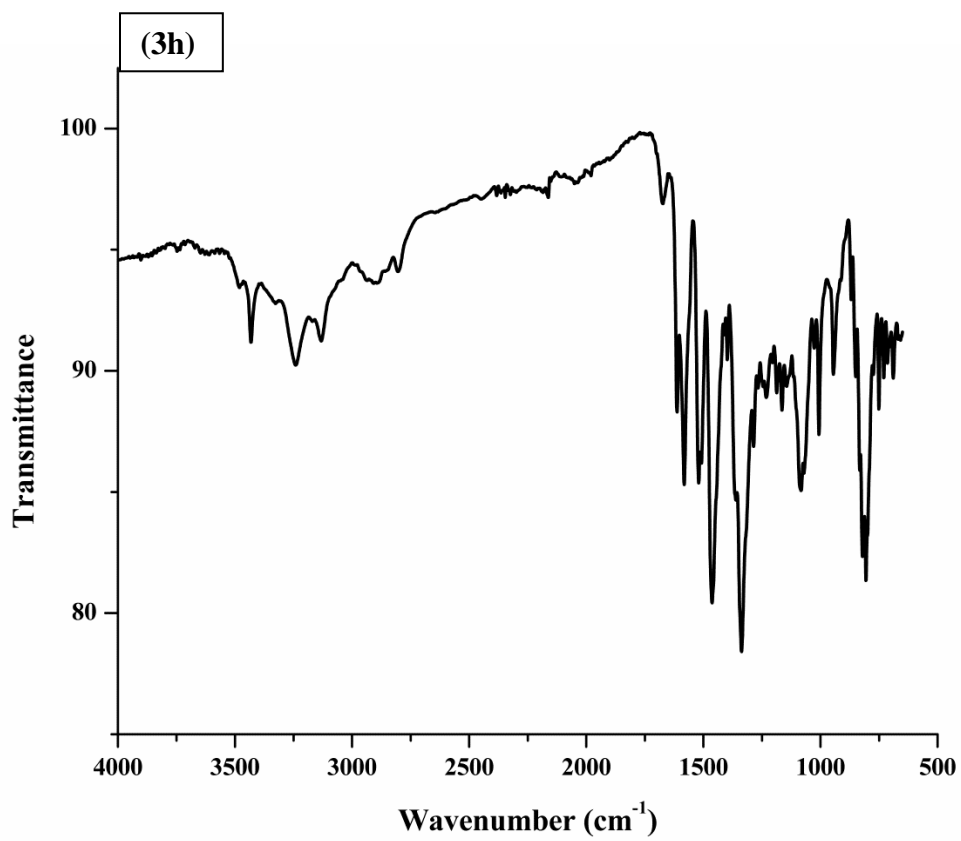



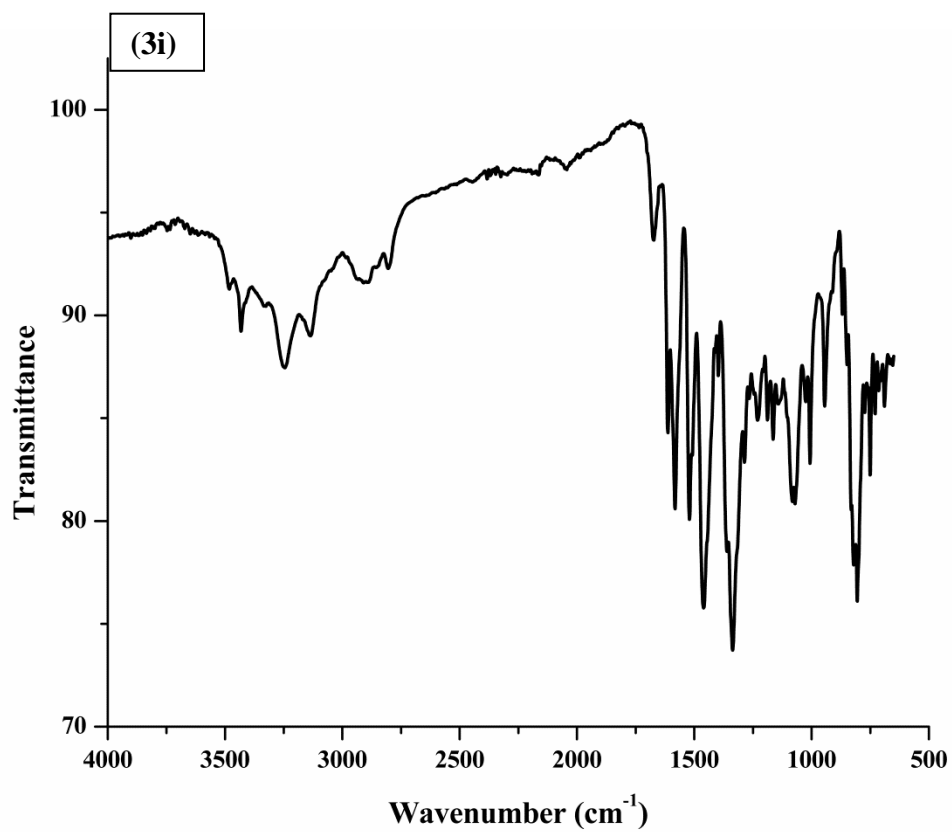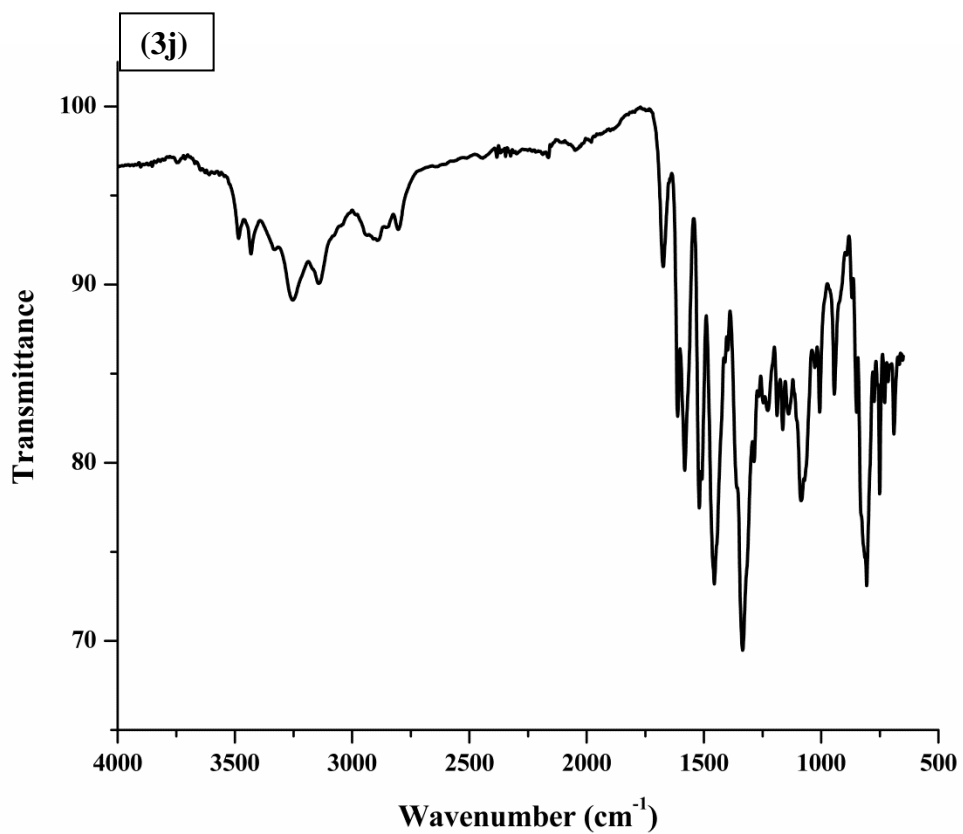

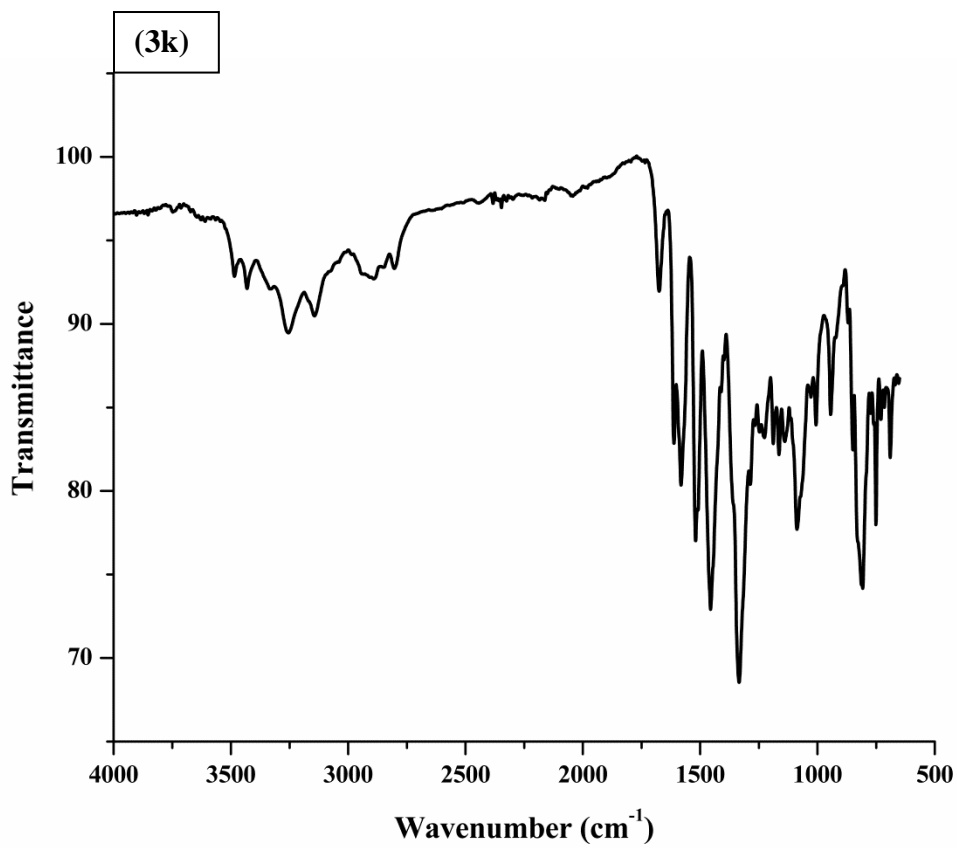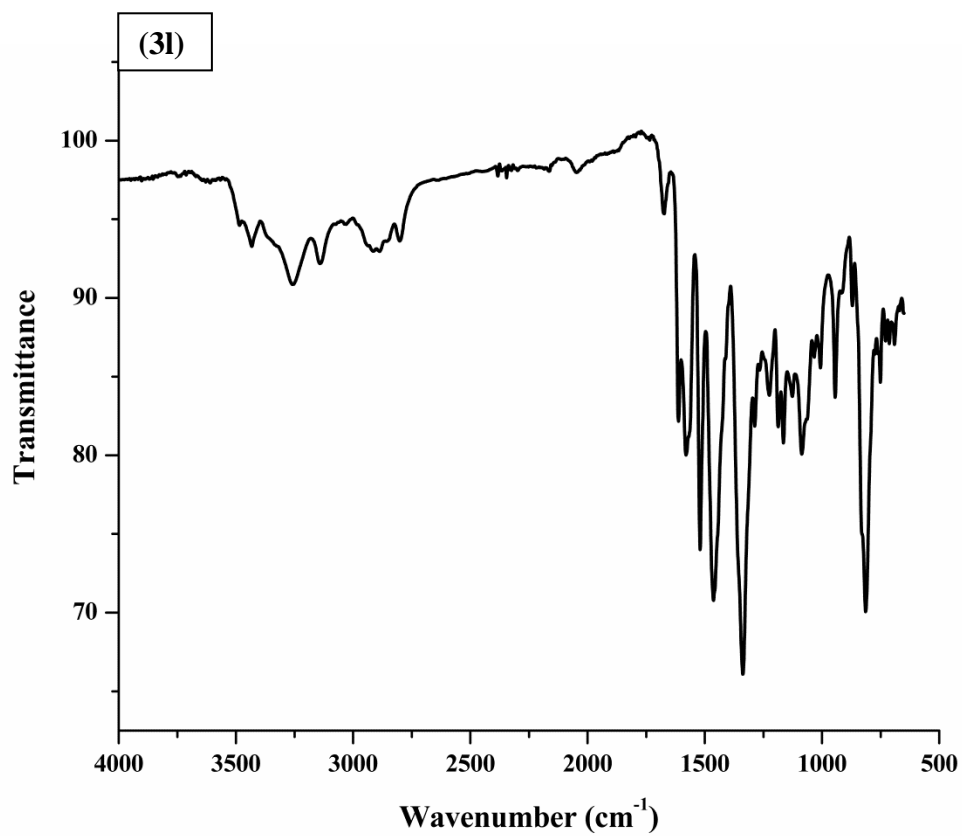

**Figure. S2.** FTIR spectra of pyrazoline derivatives (3a-3l).

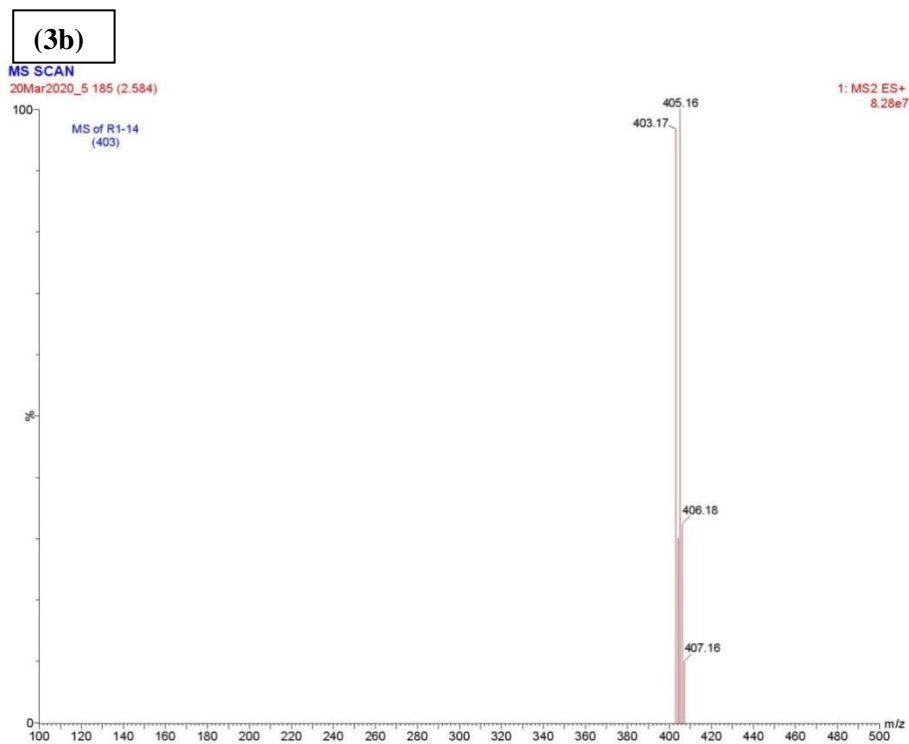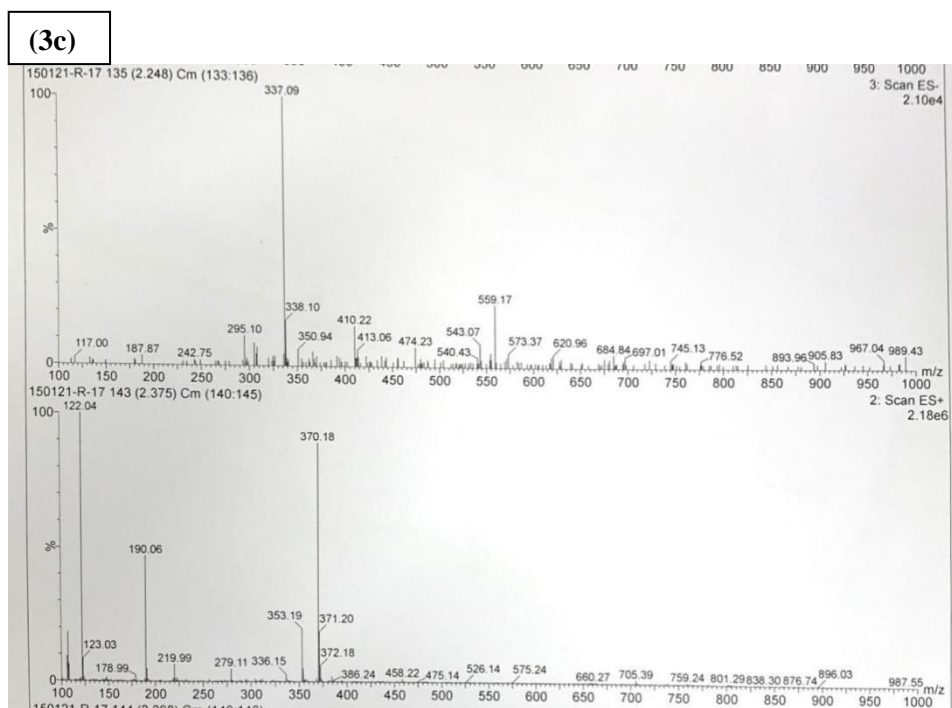

**(3d)**

**MS SCAN**

20Mar2020\_3 181 (2.528)

1: MS2 ES+  
8.50e7

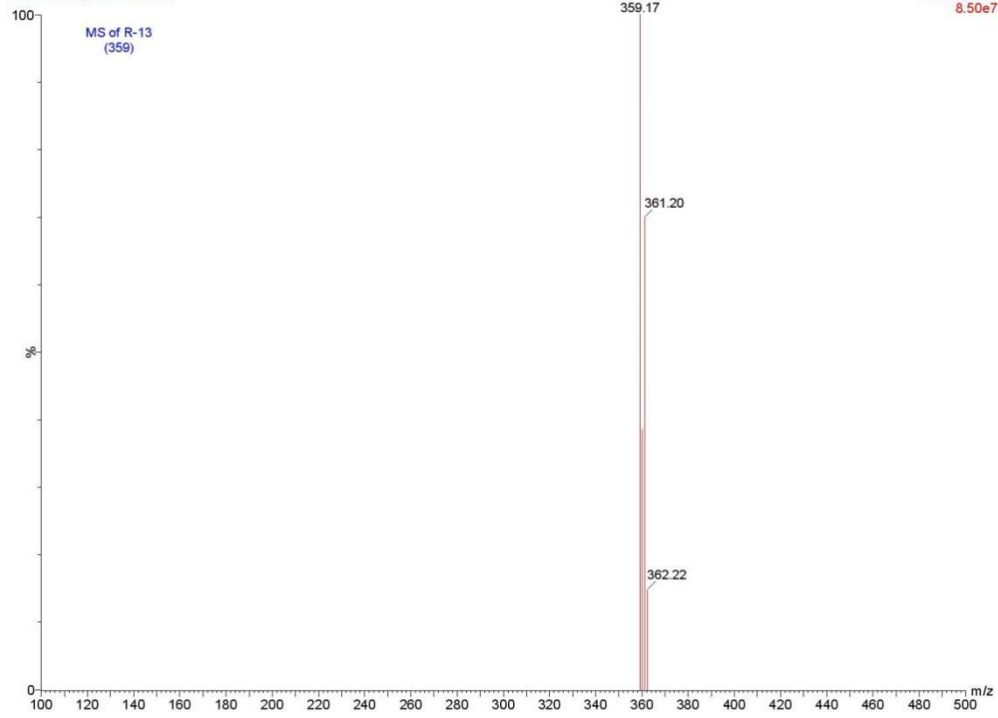

**(3e)**

+Q1: Exp 1, 0.185 to 0.546 min from Sample 33 (Y-2) of 250121.wiff (Turbo Spray), subtracted (0.005 to 0.095 min), Smoothed, Centroided, ... Max. 8.9e6 cps.

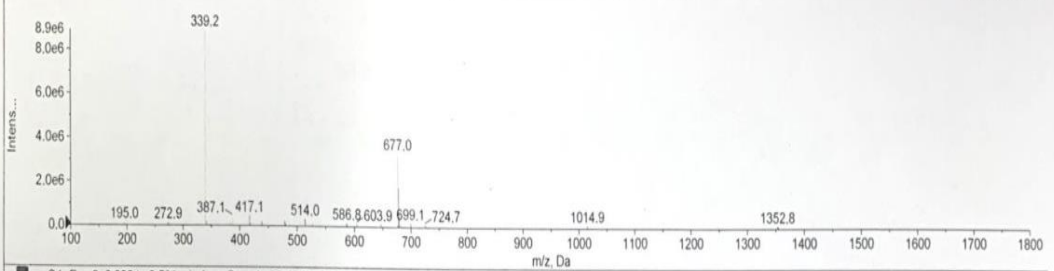

-Q1: Exp 2, 0.230 to 0.591 min from Sample 33 (Y-2) of 250121.wiff (Turbo Spray), subtracted (0.050 to 0.140 min), Smoothed, Centroided, T... Max. 3.2e6 cps.

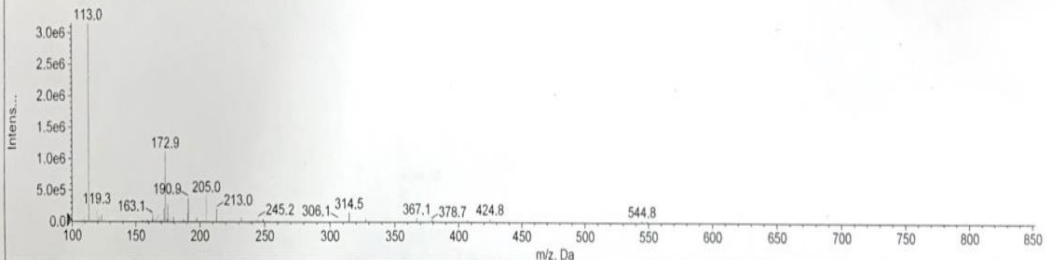

(3f)

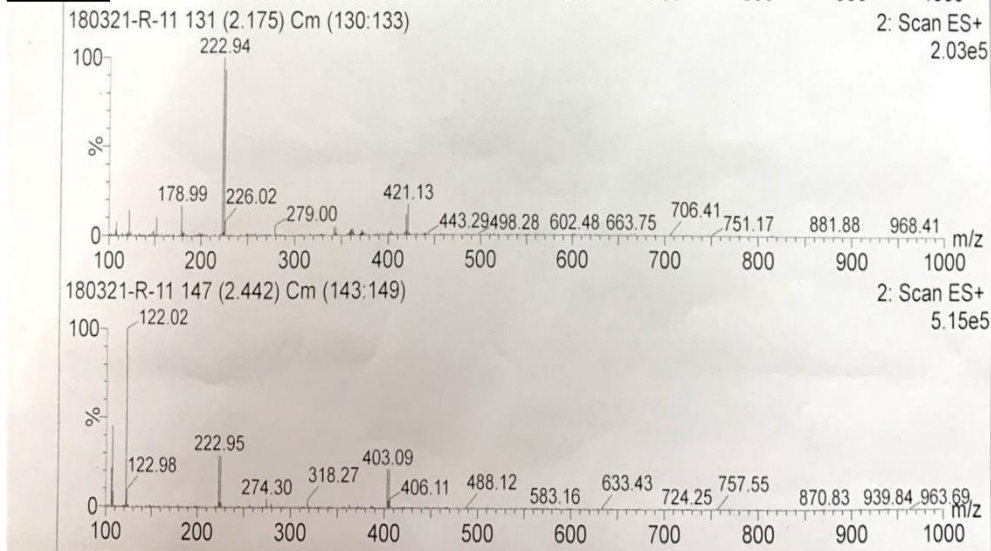

(3g)

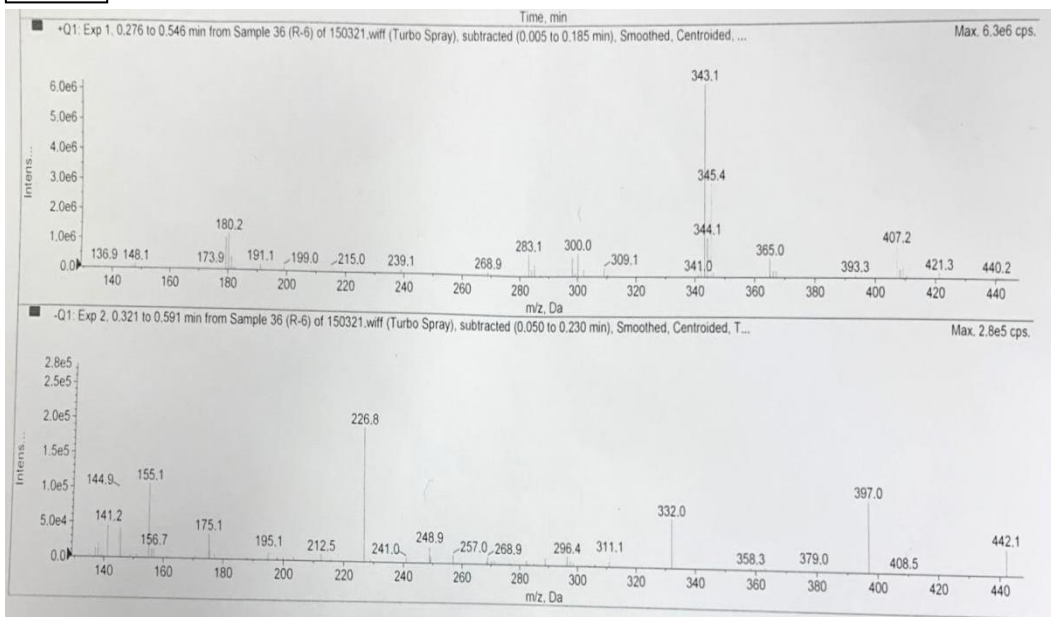

(3i)

### Display Report

#### Analysis Info

Analysis Name D:\Data\March 2020\m chem aks-nsh-299\_RB7\_01\_1309.d  
Method 2. LCMS tune wide ACN.m  
Sample Name m chem aks-nsh-299  
Comment

Acquisition Date 3/19/2020 6:04:49 PM

Operator IIT Indore  
Instrument microTOF-Q 228888.10348

#### Acquisition Parameter

|             |            |                       |           |                  |           |
|-------------|------------|-----------------------|-----------|------------------|-----------|
| Source Type | ESI        | Ion Polarity          | Positive  | Set Nebulizer    | 2.0 Bar   |
| Focus       | Not active | Set Capillary         | 4500 V    | Set Dry Heater   | 250 °C    |
| Scan Begin  | 50 m/z     | Set End Plate Offset  | -500 V    | Set Dry Gas      | 7.0 l/min |
| Scan End    | 3000 m/z   | Set Collision Cell RF | 650.0 Vpp | Set Divert Valve | Waste     |

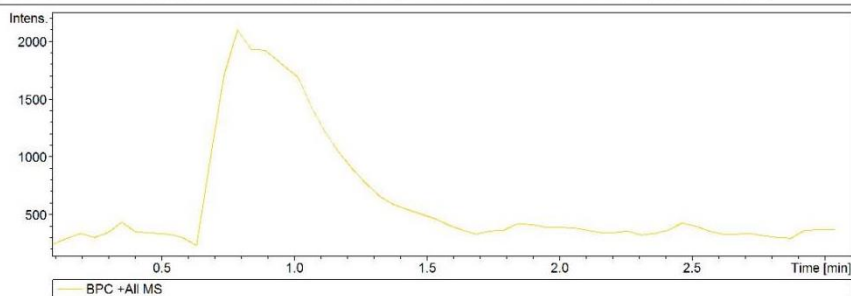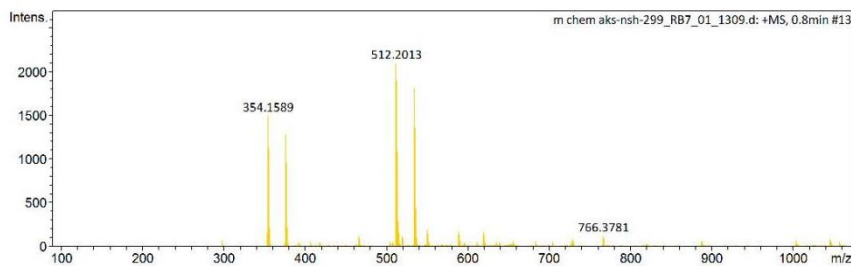

(3j)

#### MS SCAN

14Oct2019\_11 215 (3.004) Cm (192:215)

1: MS2 ES+  
9.22e4

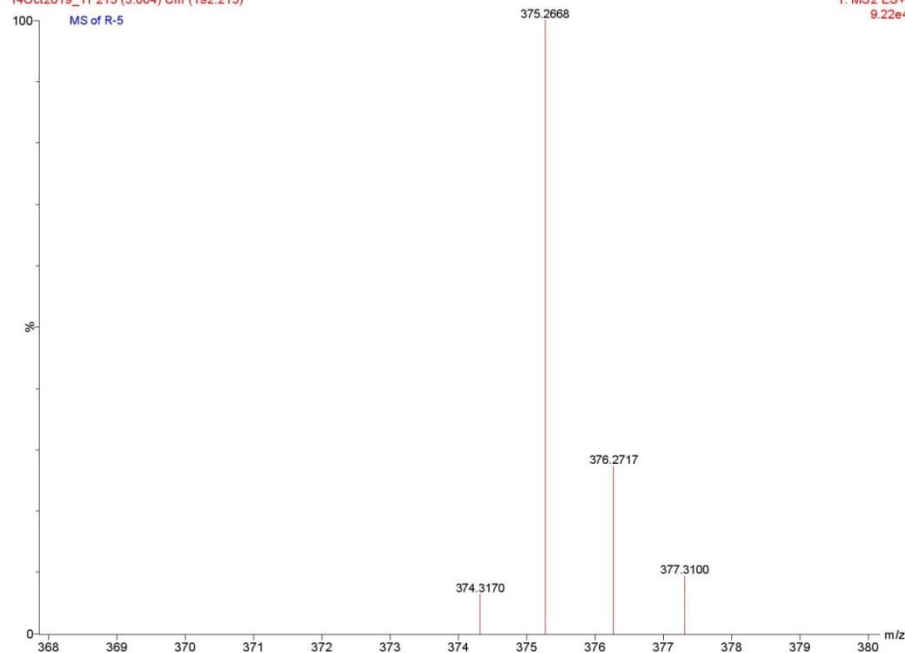

(3k)

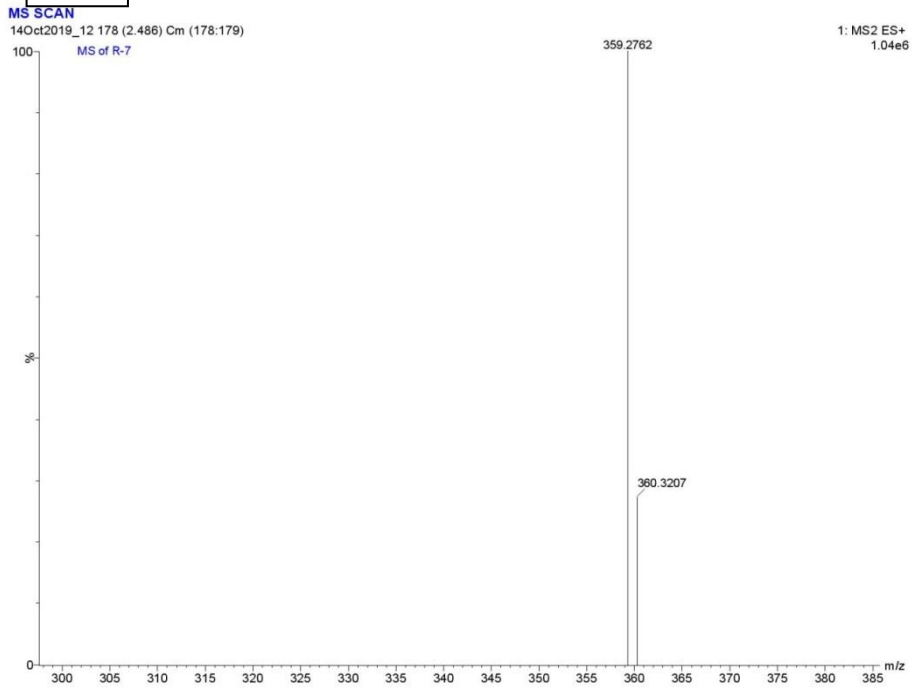

(3l)

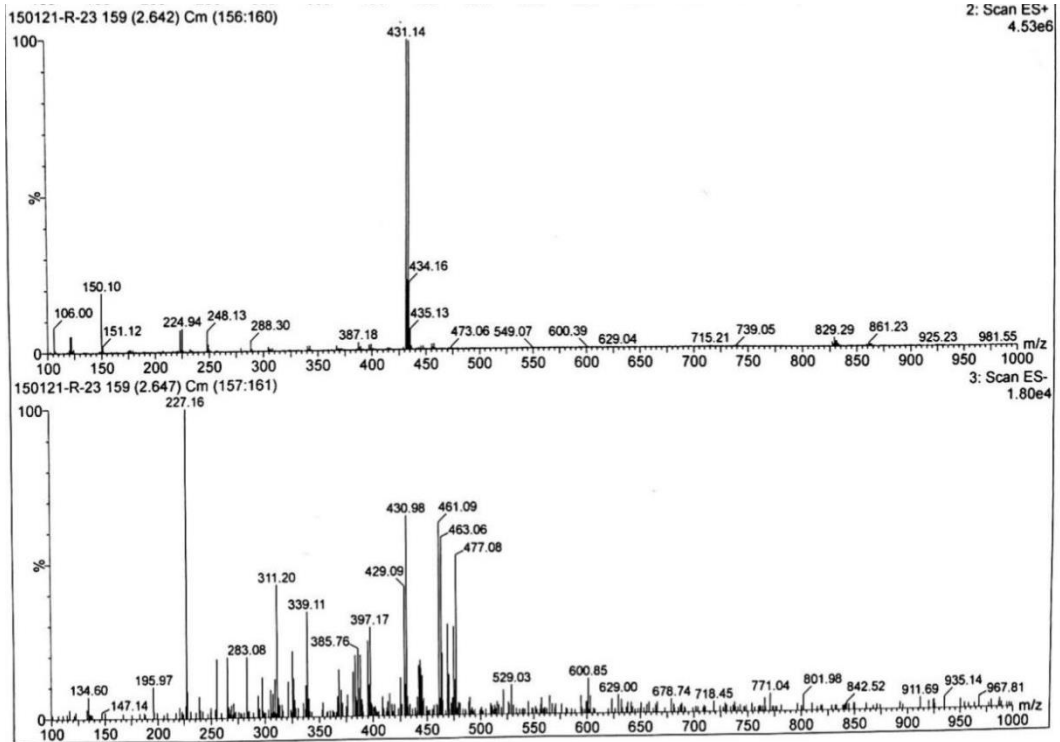

**Figure S3.** Mass spectra of pyrazoline derivatives (3a-3l).

| 3a             |                         | SAMPLE INFORMATION  |                          |
|----------------|-------------------------|---------------------|--------------------------|
| Sample Name :  | A-3-XBS-ABC             | Acquired By :       | System HPLC_01           |
| Vial :         | 20                      | Acq. Method Set :   | NON POLAR C@A20MIN 40%   |
| Injection # :  | 1                       | Injection Volume :  | 3.00 ul                  |
| Run Time :     | 20.0 Minutes            | Proc. Chnl. Descr.: | 2998 PDA 214.0 nm (2998) |
| Date Acquired: | 24-02-2022 19:32:26 IST | Date Processed :    | 24-02-2022 20:01:56 IST  |

Column Name : XSELECT PHENYL HEXYL (4.6 X 250 mm)5  $\mu$   
 Mobile phase : C: 5mM ABC in water A: 100% ACN  
 Flow rate : 1 ml/min, Temperature: Ambient  
 Flow mode : Gradient, Time/C (%): 0.0/50.0, 2.0/50.0, 10.0/20.0, 15/05.0, 17.0/05.0, 17.50/50.0. 20.0/50.0

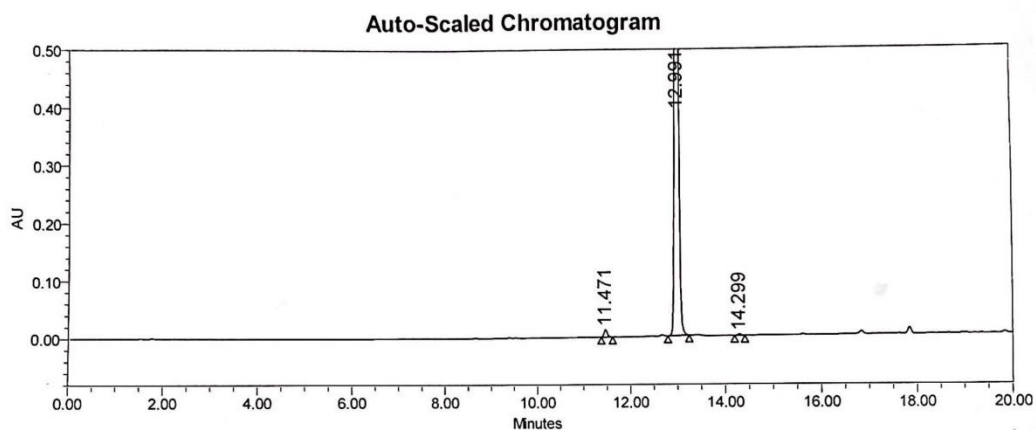

**Peak Results**

|   | RT     | Area    | % Area |
|---|--------|---------|--------|
| 1 | 11.471 | 62122   | 0.91   |
| 2 | 12.991 | 6780194 | 98.91  |
| 3 | 14.299 | 12733   | 0.19   |



3b

## SAMPLE INFORMATION

Sample Name : B-3-XBS-ABC Acquired By : System HPLC\_01  
 Vial : 71 Acq. Method Set : NON POLAR C@A20MIN 40%  
 Injection # : 1 Injection Volume : 3.00 ul  
 Run Time : 20.0 Minutes Proc. Chnl. Descr.: 2998 PDA 328.0 nm (2998)  
 Date Acquired: 25-02-2022 16:46:00 IST Date Processed : 25-02-2022 18:23:30 IST

Column Name : XSELECT PHENYL HEXYL (4.6 X 250 mm)5  $\mu$   
 Mobile phase : C: 5mM ABC in water A: 100% ACN  
 Flow rate : 1 ml/min, Temperature : Ambient  
 Flow mode : Gradient , Time/C (%) : 0.0/50.0, 2.0/50.0, 10.0/20.0, 15/05.0, 17.0/05.0, 17.50/50.0. 20.0/50.0

## Auto-Scaled Chromatogram

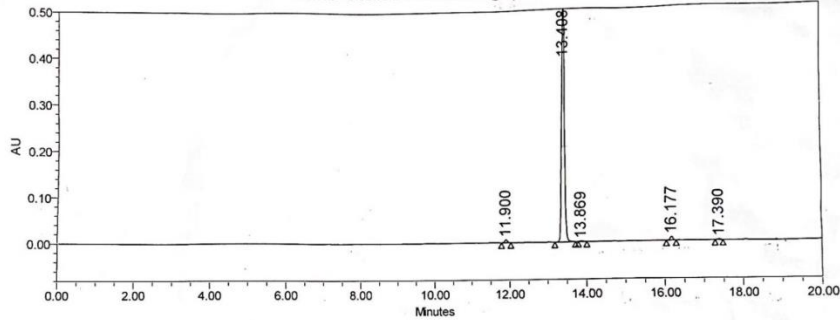

## Peak Results

|   | RT     | Area    | % Area |
|---|--------|---------|--------|
| 1 | 11.900 | 32052   | 1.20   |
| 2 | 13.408 | 2589429 | 96.83  |
| 3 | 13.869 | 7716    | 0.29   |
| 4 | 16.177 | 38247   | 1.43   |
| 5 | 17.390 | 6715    | 0.25   |

3c

## SAMPLE INFORMATION

Sample Name : C-3-XBS-ABC Acquired By : System HPLC\_01  
 Vial : 104 Acq. Method Set : NON POLAR C@A20MIN 40%  
 Injection # : 1 Injection Volume : 3.00 ul  
 Run Time : 20.0 Minutes Proc. Chnl. Descr.: 2998 PDA 254.0 nm (2998)  
 Date Acquired: 24-02-2022 18:46:40 IST Date Processed : 24-02-2022 19:16:50 IST

Column Name : XSELECT PHENYL HEXYL (4.6 X 250 mm)5  $\mu$   
 Mobile phase : C: 5mM ABC in water A: 100% ACN  
 Flow rate : 1 ml/min, Temperature : Ambient  
 Flow mode : Gradient , Time/C (%) : 0.0/50.0, 2.0/50.0, 10.0/20.0, 15/05.0, 17.0/05.0, 17.50/50.0. 20.0/50.0

## Auto-Scaled Chromatogram

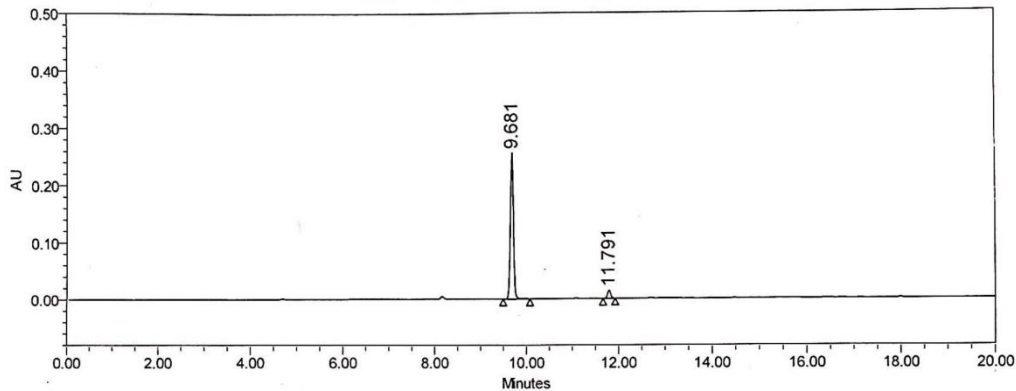

## Peak Results

|   | RT     | Area    | % Area |
|---|--------|---------|--------|
| 1 | 9.681  | 1203403 | 94.65  |
| 2 | 11.791 | 68016   | 5.35   |

3d

## SAMPLE INFORMATION

Sample Name : D-3-XBS-ABC Acquired By : System HPLC\_01  
 Vial : 72 Acq. Method Set : NON POLAR C@A20MIN 40%  
 Injection # : 1 Injection Volume : 3.00 ul  
 Run Time : 20.0 Minutes Proc. Chnl. Descr.: 2998 PDA 214.0 nm (2998)  
 Date Acquired: 25-02-2022 17:08:46 IST Date Processed : 25-02-2022 18:21:10 IST

Column Name : XSELECT PHENYL HEXYL (4.6 X 250 mm)5  $\mu$   
 Mobile phase : C: 5mM ABC in water A: 100% ACN  
 Flow rate : 1 ml/min, Temperature: Ambient  
 Flow mode : Gradient, Time/C (%): 0.0/50.0, 2.0/50.0, 10.0/20.0, 15/05.0, 17.0/05.0, 17.50/50.0. 20.0/50.0

## Auto-Scaled Chromatogram

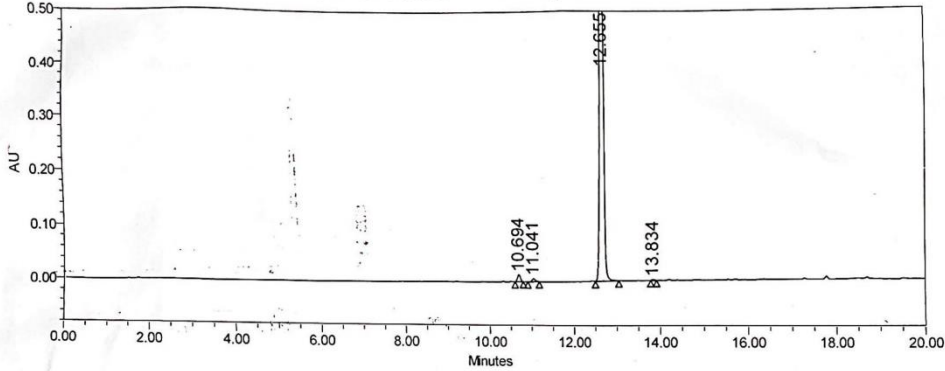

## Peak Results

|   | RT     | Area    | % Area |
|---|--------|---------|--------|
| 1 | 10.694 | 65244   | 1.11   |
| 2 | 11.041 | 32983   | 0.56   |
| 3 | 12.655 | 5782277 | 98.21  |
| 4 | 13.834 | 6952    | 0.12   |

3e

## SAMPLE INFORMATION

Name : E-3-XBS-ABC Acquired By : System HPLC\_01  
 Vial : 49 Acq. Method Set : NON POLAR C@A20MIN 40%  
 Injection # : 1 Injection Volume : 3.00 ul  
 Run Time : 20.0 Minutes Proc. Chnl. Descr.: 2998 PDA 260.0 nm (2998)  
 Date Acquired: 25-02-2022 17:31:29 IST Date Processed : 25-02-2022 18:19:07 IST

Column Name : XSELECT PHENYL HEXYL (4.6 X 250 mm)5  $\mu$   
 Mobile phase : C: 5mM ABC in water A: 100% ACN  
 Flow rate : 1 ml/min, Temperature: Ambient  
 Flow mode : Gradient, Time/C (%): 0.0/50.0, 2.0/50.0, 10.0/20.0, 15/05.0, 17.0/05.0, 17.50/50.0. 20.0/50.0

## Auto-Scaled Chromatogram

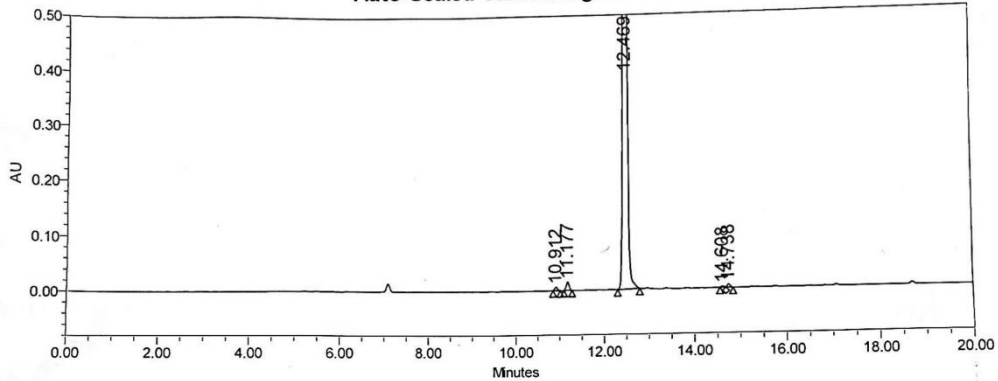

## Peak Results

|   | RT     | Area    | % Area |
|---|--------|---------|--------|
| 1 | 10.912 | 28696   | 0.29   |
| 2 | 11.177 | 70449   | 0.72   |
| 3 | 12.469 | 9692199 | 98.61  |
| 4 | 14.608 | 11032   | 0.11   |
| 5 | 14.738 | 26581   | 0.27   |

| 3f             |                         | SAMPLE INFORMATION  |                         |
|----------------|-------------------------|---------------------|-------------------------|
| Sample Name :  | S3-XBS-ABC              | Acquired By :       | System HPLC_01          |
| Vial :         | 103                     | Acq. Method Set :   | NON POLAR C@A20MIN 40%  |
| Injection # :  | 1                       | Injection Volume :  | 3.00 ul                 |
| Run Time :     | 20.0 Minutes            | Proc. Chnl. Descr.: | 2998 PDA 258.0 nm (2998 |
| Date Acquired: | 23-02-2022 19:17:27 IST | Date Processed :    | 23-02-2022 19:40:37 IST |

Column Name : XSELECT PHENYL HEXYL (4.6 X 250 mm)5  $\mu$   
 Mobile phase : C: 5mM ABC in water A: 100% ACN  
 Flow rate : 1 ml/min, Temperature : Ambient  
 Flow mode : Gradient , Time/C (%) : 0.0/50.0, 2.0/50.0, 10.0/20.0, 15/05.0, 17.0/05.0, 17.50/50.0. 20.0/50.0

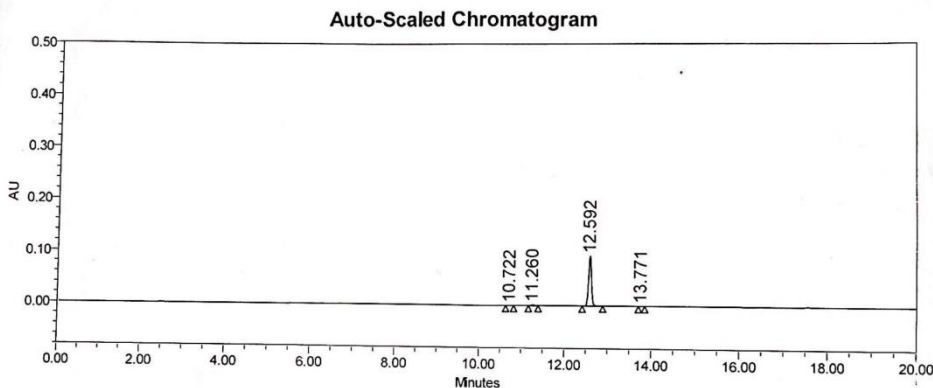

**Peak Results**

|   | RT     | Area   | % Area |
|---|--------|--------|--------|
| 1 | 10.722 | 2024   | 0.44   |
| 2 | 11.260 | 7475   | 1.63   |
| 3 | 12.592 | 447879 | 97.72  |
| 4 | 13.771 | 930    | 0.20   |

| 3g             |                         | SAMPLE INFORMATION  |                         |
|----------------|-------------------------|---------------------|-------------------------|
| Sample Name :  | G-3-XBS-ABC             | Acquired By :       | System HPLC_01          |
| Vial :         | 106                     | Acq. Method Set :   | NON POLAR C@A20MIN 40%  |
| Injection # :  | 1                       | Injection Volume :  | 3.00 ul                 |
| Run Time :     | 20.0 Minutes            | Proc. Chnl. Descr.: | 2998 PDA 214.0 nm (2998 |
| Date Acquired: | 24-02-2022 19:55:28 IST | Date Processed :    | 24-02-2022 20:17:13 IST |

Column Name : XSELECT PHENYL HEXYL (4.6 X 250 mm)5  $\mu$   
 Mobile phase : C: 5mM ABC in water A: 100% ACN  
 Flow rate : 1 ml/min, Temperature : Ambient  
 Flow mode : Gradient , Time/C (%) : 0.0/50.0, 2.0/50.0, 10.0/20.0, 15/05.0, 17.0/05.0, 17.50/50.0. 20.0/50.0

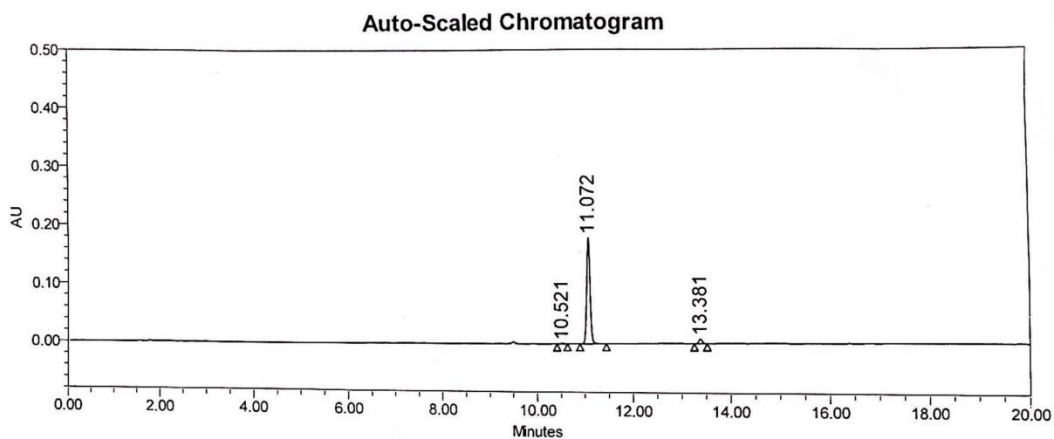

**Peak Results**

|   | RT     | Area   | % Area |
|---|--------|--------|--------|
| 1 | 10.521 | 5061   | 0.55   |
| 2 | 11.072 | 870230 | 95.00  |
| 3 | 13.381 | 40719  | 4.45   |

3h

**SAMPLE INFORMATION**

Sample Name : H3-XBS-ABC Acquired By : System HPLC\_01  
 Vial : 23 Acq. Method Set : NON POLAR C@A20MIN 40%  
 Injection # : 1 Injection Volume : 5.00 ul  
 Run Time : 20.0 Minutes Proc. Chnl. Descr.: 2998 PDA 214.0 nm (2998)  
 Date Acquired: 02-03-2022 19:01:40 IST Date Processed : 02-03-2022 19:25:19 IST

Column Name : XSELECT PHENYL HEXYL (4.6 X 250 mm)5 µ  
 Mobile phase : C: 5mM ABC in water A: 100% ACN  
 Flow rate : 1 ml/min, Temperature: Ambient  
 Flow mode : Gradient , Time/C (%) : 0.0/50.0, 2.0/50.0, 10.0/20.0, 15/05.0, 17.0/05.0, 17.50/50.0, 20.0/50.0

**Auto-Scaled Chromatogram**

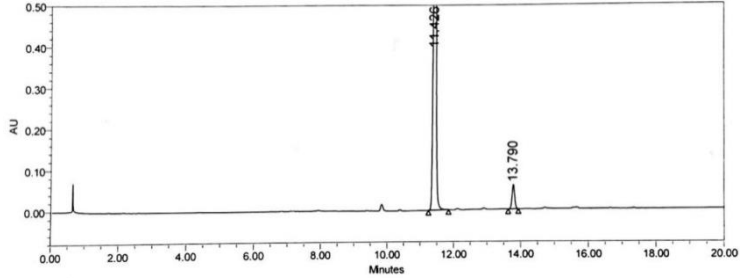

**Peak Results**

| RT       | Area    | % Area |
|----------|---------|--------|
| 1 11.426 | 7042027 | 95.57  |
| 2 13.790 | 326588  | 4.43   |

3i

**SAMPLE INFORMATION**

Sample Name : I3 Acquired By : System HPLC\_01  
 Vial : 57 Acq. Method Set : NON POLAR C@A20MIN 40%  
 Injection # : 1 Injection Volume : 3.00 ul  
 Run Time : 20.0 Minutes Proc. Chnl. Descr.: 2998 PDA 270.0 nm (2998  
 (190-400)nm)  
 Date Acquired: 18-02-2022 17:55:39 IST Date Processed : 18-02-2022 18:31:07 IST

Column Name : XBridgeC8 (4.6 X 250 mm)5 µ  
 Mobile phase : C: 0.1% AH in Water A: 100% ACN  
 Flow rate : 1 ml/min, Column Temperature: Ambient.  
 Flow mode : Gradient , Time/C (%) : 0.0/60.0, 2.0/60.0, 9.0/25.0, 15.0/5.0, 18.0/5.0, 18.50/60.0, 20.0/60.0

**Auto-Scaled Chromatogram**

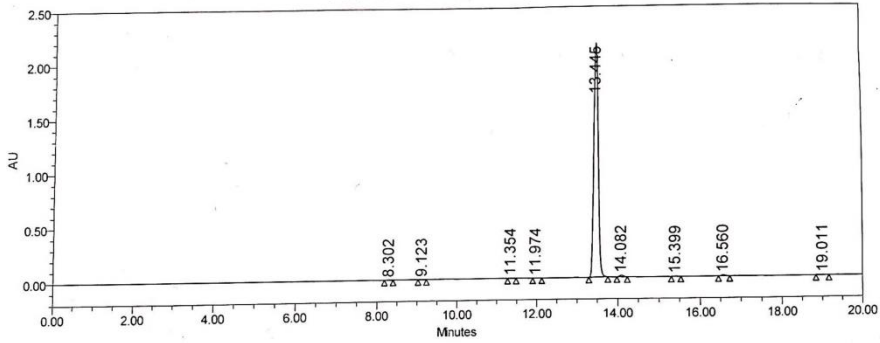

**Peak Results**

| RT       | Area     | % Area |
|----------|----------|--------|
| 1 8.302  | 11162    | 0.07   |
| 2 9.123  | 8228     | 0.05   |
| 3 11.354 | 7115     | 0.04   |
| 4 11.974 | 7084     | 0.04   |
| 5 13.445 | 16191623 | 98.51  |
| 6 14.082 | 107155   | 0.65   |
| 7 15.399 | 26533    | 0.16   |
| 8 16.560 | 66586    | 0.41   |
| 9 19.011 | 11701    | 0.07   |

3j

## SAMPLE INFORMATION

|                |                         |                     |                         |
|----------------|-------------------------|---------------------|-------------------------|
| Sample Name :  | J3-XBS-ABC              | Acquired By :       | System HPLC_01          |
| Vial :         | 101                     | Acq. Method Set :   | NON POLAR C@A20MIN 40%  |
| Injection # :  | 1                       | Injection Volume :  | 3.00 ul                 |
| Run Time :     | 20.0 Minutes            | Proc. Chnl. Descr.: | 2998 PDA 214.0 nm (2998 |
| Date Acquired: | 23-02-2022 18:32:06 IST | Date Processed :    | 23-02-2022 18:56:48 IST |

Column Name : XSELECT PHENYL HEXYL (4.6 X 250 mm)5  $\mu$   
 Mobile phase : C: 5mM ABC in water A: 100% ACN  
 Flow rate : 1 ml/min, Temperature : Ambient  
 Flow mode : Gradient , Time/C (%) : 0.0/50.0, 2.0/50.0, 10.0/20.0, 15/05.0, 17.0/05.0, 17.50/50.0. 20.0/50.0

## Auto-Scaled Chromatogram

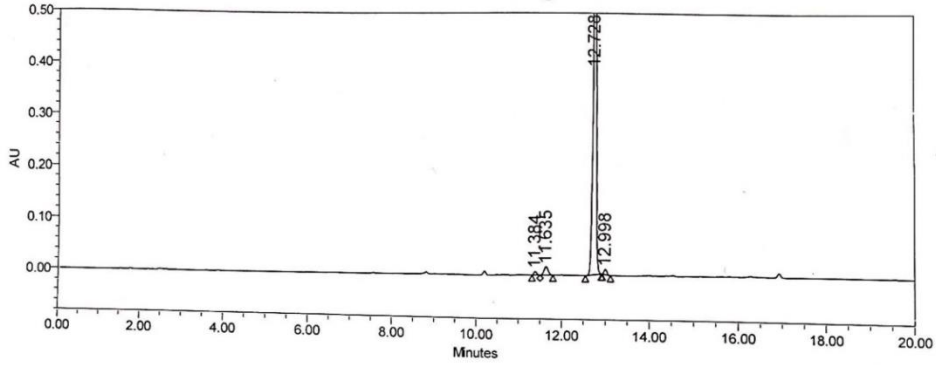

## Peak Results

|   | RT     | Area    | % Area |
|---|--------|---------|--------|
| 1 | 11.384 | 29812   | 0.75   |
| 2 | 11.635 | 101812  | 2.55   |
| 3 | 12.728 | 3822752 | 95.61  |
| 4 | 12.998 | 43917   | 1.10   |

3k

## SAMPLE INFORMATION

|                |                         |                     |                         |
|----------------|-------------------------|---------------------|-------------------------|
| Sample Name :  | K-3-XBS-ABC             | Acquired By :       | System HPLC_01          |
| Vial :         | 96                      | Acq. Method Set :   | NON POLAR C@A20MIN 40%  |
| Injection # :  | 1                       | Injection Volume :  | 3.00 ul                 |
| Run Time :     | 20.0 Minutes            | Proc. Chnl. Descr.: | 2998 PDA 214.0 nm (2998 |
| Date Acquired: | 07-03-2022 17:59:11 IST |                     | (190-400)nm             |
|                |                         | Date Processed :    | 07-03-2022 18:49:07 IST |

Column Name : XBS(4.6 X 250 mm)5  $\mu$   
 Mobile phase : C: 5mM ABC in water A: 100% ACN  
 Flow rate : 1 ml/min, Temperature : Ambient  
 Flow mode : Gradient , Time/C (%) : 0.0/70.0, 2.0/70.0, 6.0/40.0, 12.0/40.0, 15.0/5.0, 18.0/5.0, 18.50/70.0, 20.0/70.0

## Auto-Scaled Chromatogram

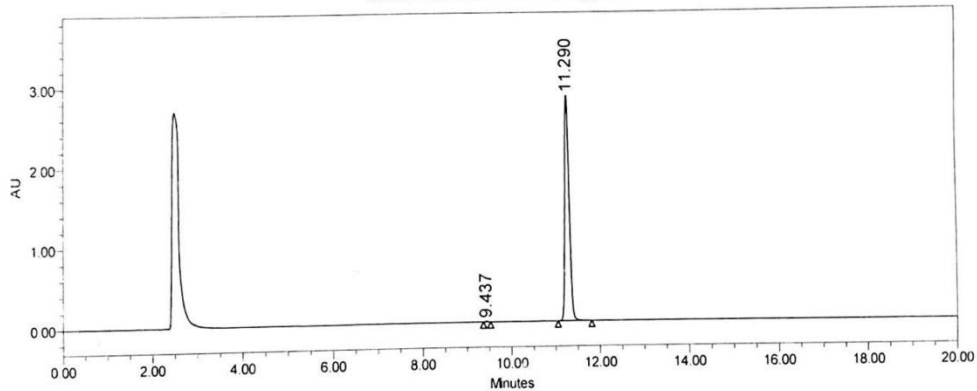

## Peak Results

|   | RT     | Area     | % Area |
|---|--------|----------|--------|
| 1 | 9.437  | 42547    | 0.21   |
| 2 | 11.290 | 19795397 | 99.79  |



|                |                         |                           |                                      |
|----------------|-------------------------|---------------------------|--------------------------------------|
| <b>31</b>      |                         | <b>SAMPLE INFORMATION</b> |                                      |
| Sample Name :  | 13                      | Acquired By :             | System HPLC_01                       |
| Vial :         | 57                      | Acq. Method Set :         | NON POLAR C@A20MIN 40%               |
| Injection # :  | 1                       | Injection Volume :        | 3.00 ul                              |
| Run Time :     | 20.0 Minutes            | Proc. Chnl. Descr.:       | 2998 PDA 270.0 nm (2998 (190-400)nm) |
| Date Acquired: | 18-02-2022 17:55:39 IST | Date Processed :          | 18-02-2022 18:31:07 IST              |

  

|                |                                                                                                 |
|----------------|-------------------------------------------------------------------------------------------------|
| Column Name :  | XBridgeC8 (4.6 X250 mm)5 μ                                                                      |
| Mobile phase : | C : 0.1% AH in Water A : 100% ACN                                                               |
| Flow rate :    | 1 ml/min, Column Temperature : Ambient                                                          |
| Flow mode :    | Gradient, Time/C (%) :: 0.0/60.0, 2.0/60.0, 9.0/25.0, 15.0/5.0, 18.0/5.0, 18.50/60.0, 20.0/60.0 |

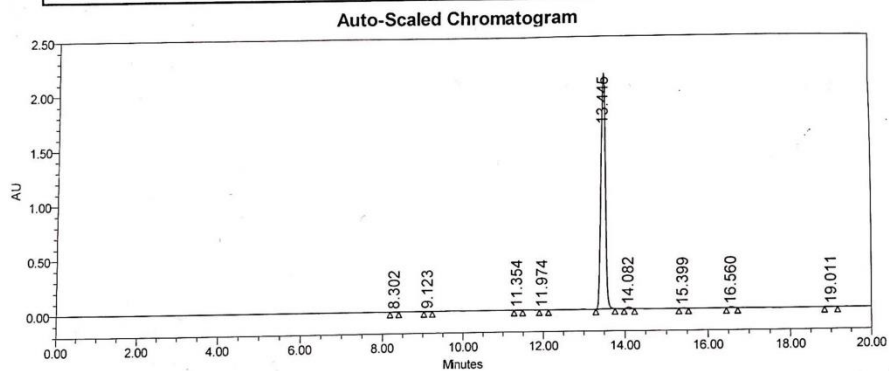

**Peak Results**

|   | RT     | Area     | % Area |
|---|--------|----------|--------|
| 1 | 8.302  | 11162    | 0.07   |
| 2 | 9.123  | 8228     | 0.05   |
| 3 | 11.354 | 7115     | 0.04   |
| 4 | 11.974 | 7084     | 0.04   |
| 5 | 13.445 | 16191623 | 98.51  |
| 6 | 14.082 | 107155   | 0.65   |
| 7 | 15.399 | 26533    | 0.16   |
| 8 | 16.560 | 66586    | 0.41   |

  

|   | RT     | Area  | % Area |
|---|--------|-------|--------|
| 9 | 19.011 | 11701 | 0.07   |

**Figure. S4.** HPLC spectra of pyrazoline derivatives (3a-3l).

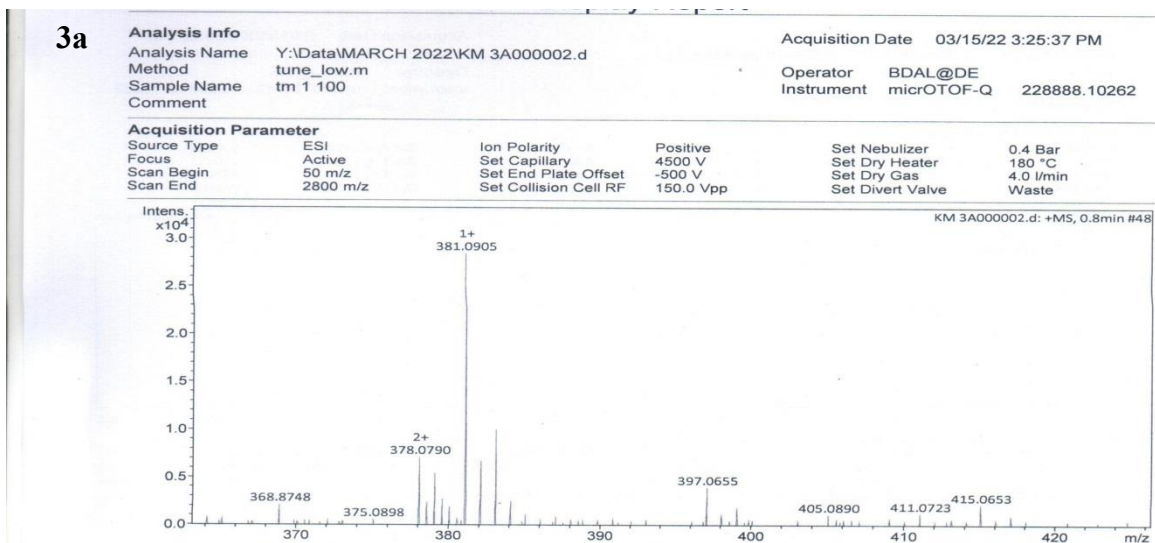

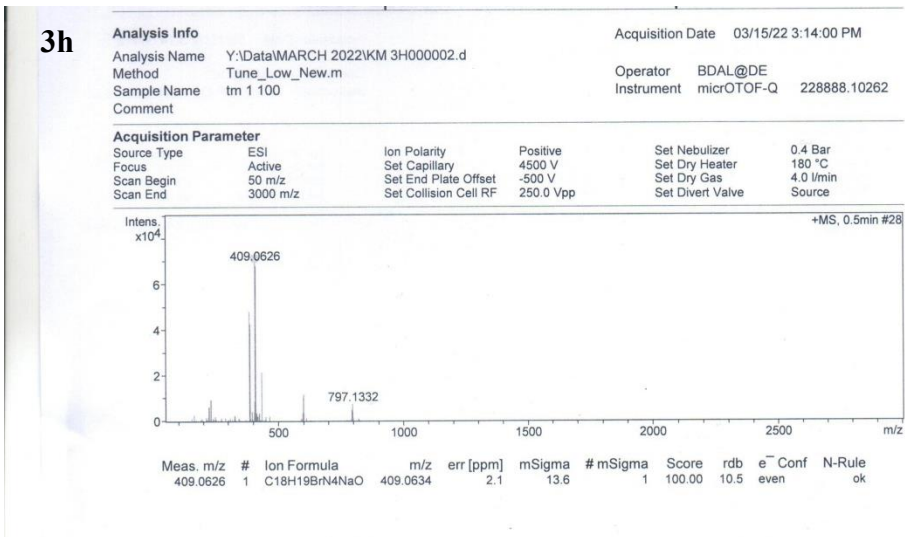

**Figure. S5.** HRMS spectra of lead compounds (3a and 3h).
